# Supplementary material
Source: PubMed Central journal article supplement (PMC137556)
Supplement: pnas_182558799_11.pdf [file pnas_182558799_11.pdf]

mock WT *cagN*<sup>-</sup> *cagA*<sup>-</sup> *cagE*<sup>-</sup> PAI

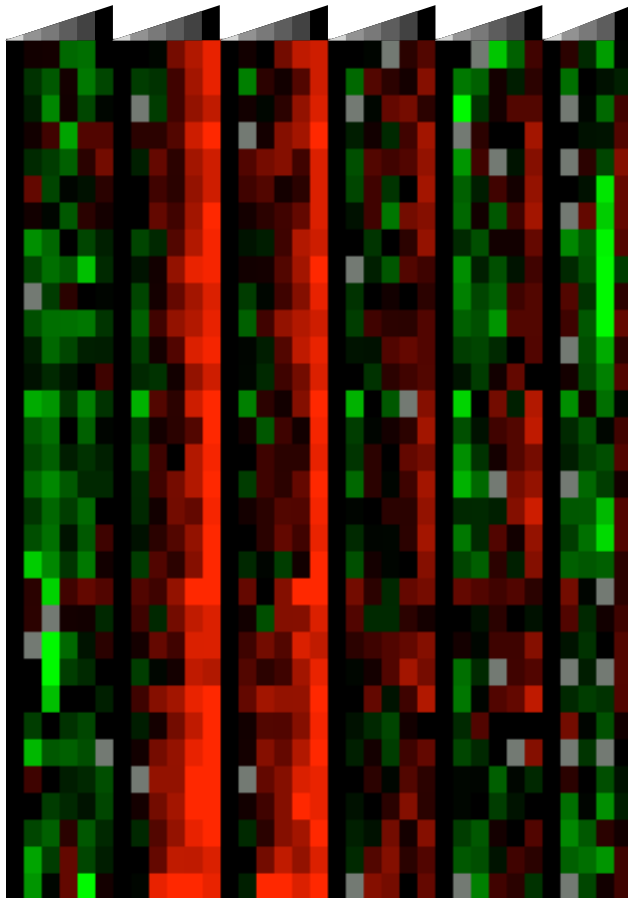

bone morphogenetic protein 2  
 bullous pemphigoid antigen 1  
 interferon stimulated gene  
 programmed cell death 10  
 transmembrane protease, serine 2  
 AF-6 (Drosophila, trithorax homolog)  
 cisplatin resistance associated  
 cylindromatosis (turban tumor syndrome)  
 SOCS box-containing WD protein SWiP-1  
 proline rich 2  
 fatty-acid-Coenzyme A ligase, long-chain 2  
 phosphatidylinositol glycan, class A  
 feminization 1 homolog A  
 extracellular matrix protein 1  
 syndecan binding protein (syntenin)  
 bullous pemphigoid antigen 1  
 B-cell translocation gene 1  
 MAX dimerization protein  
 laminin, gamma 2  
 matrix metalloproteinase 14  
 integrin, alpha V  
 baculoviral IAP repeat-containing 2  
 CEGP1

1/4 0 4 fold induced

0 1 3 6 12 24 hours
