# Supplementary material
Source: PubMed Central journal article supplement (PMC137556)
Supplement: pnas_182558799_17.pdf [file pnas_182558799_17.pdf]

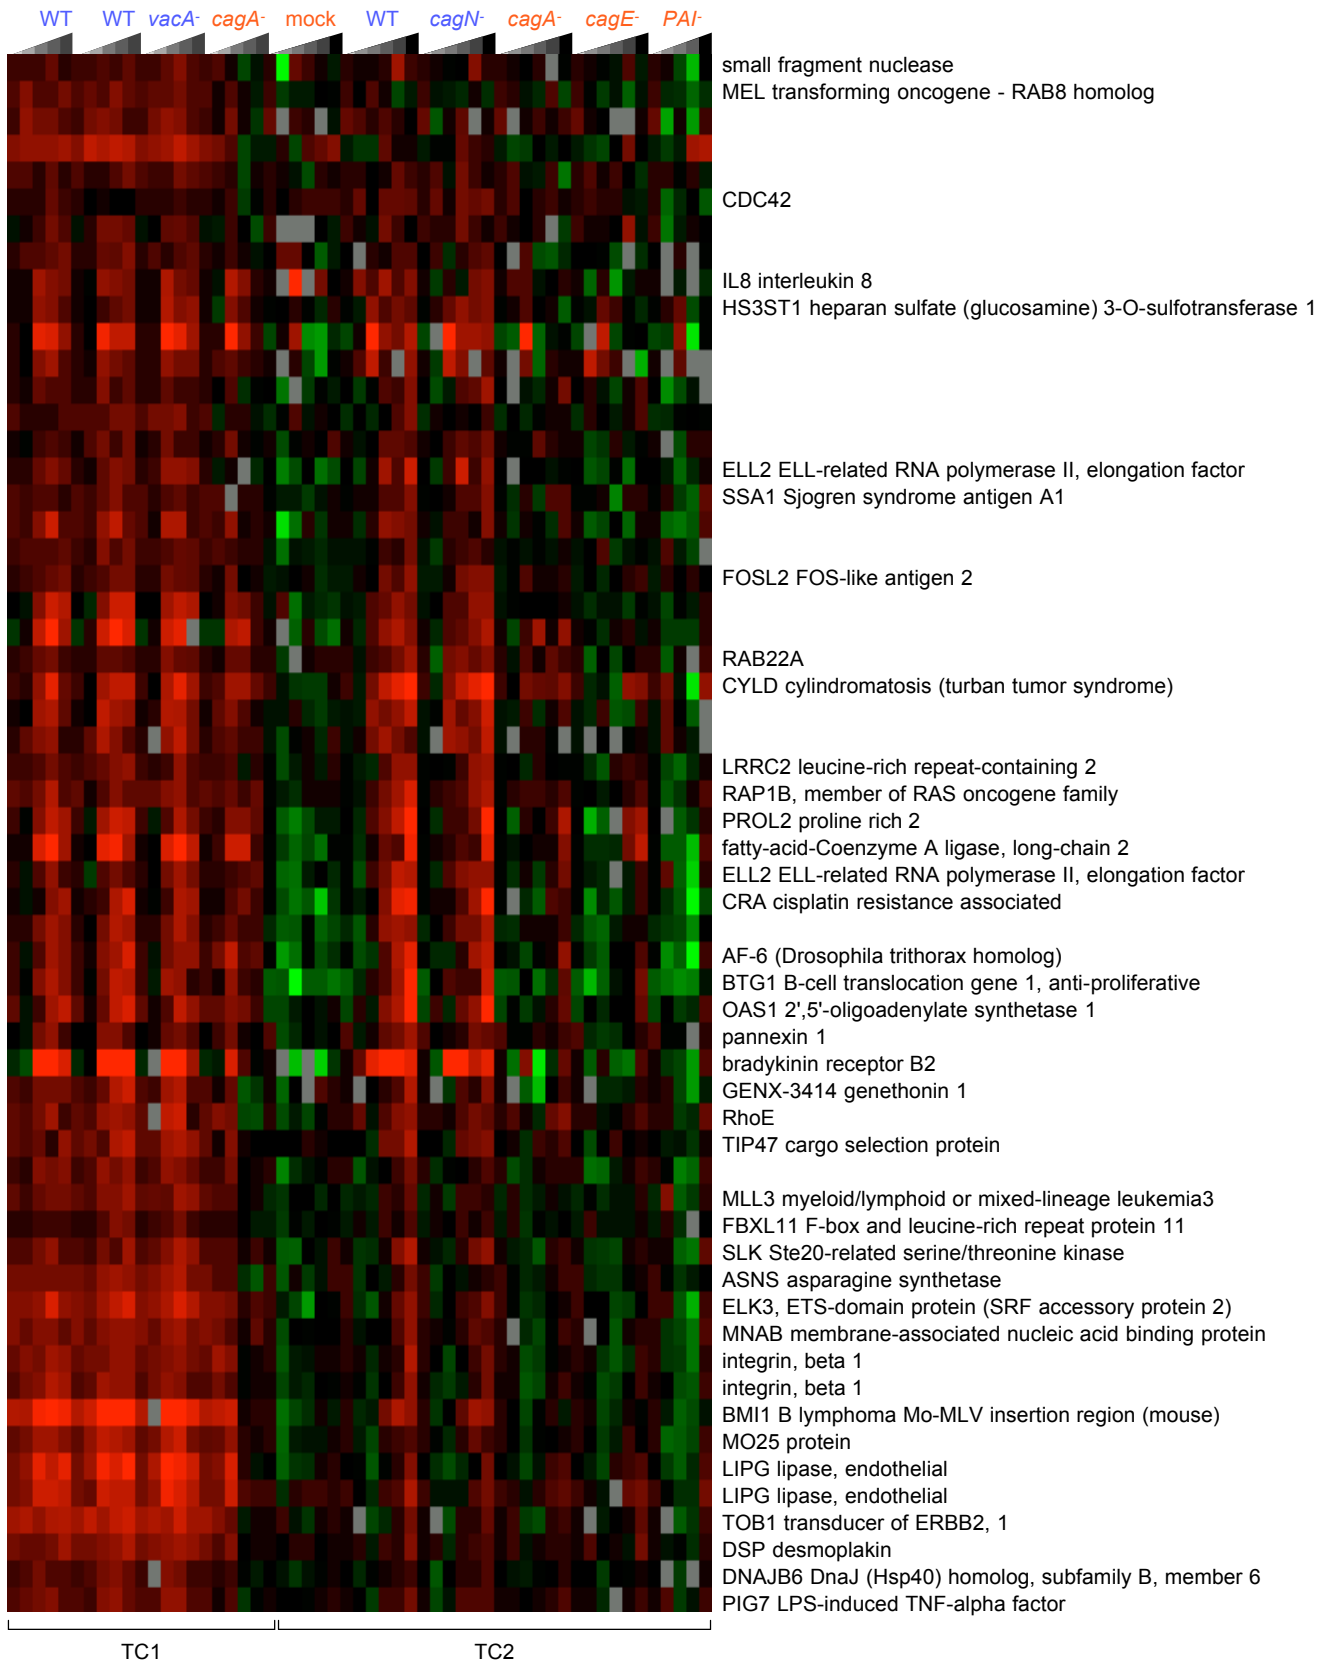

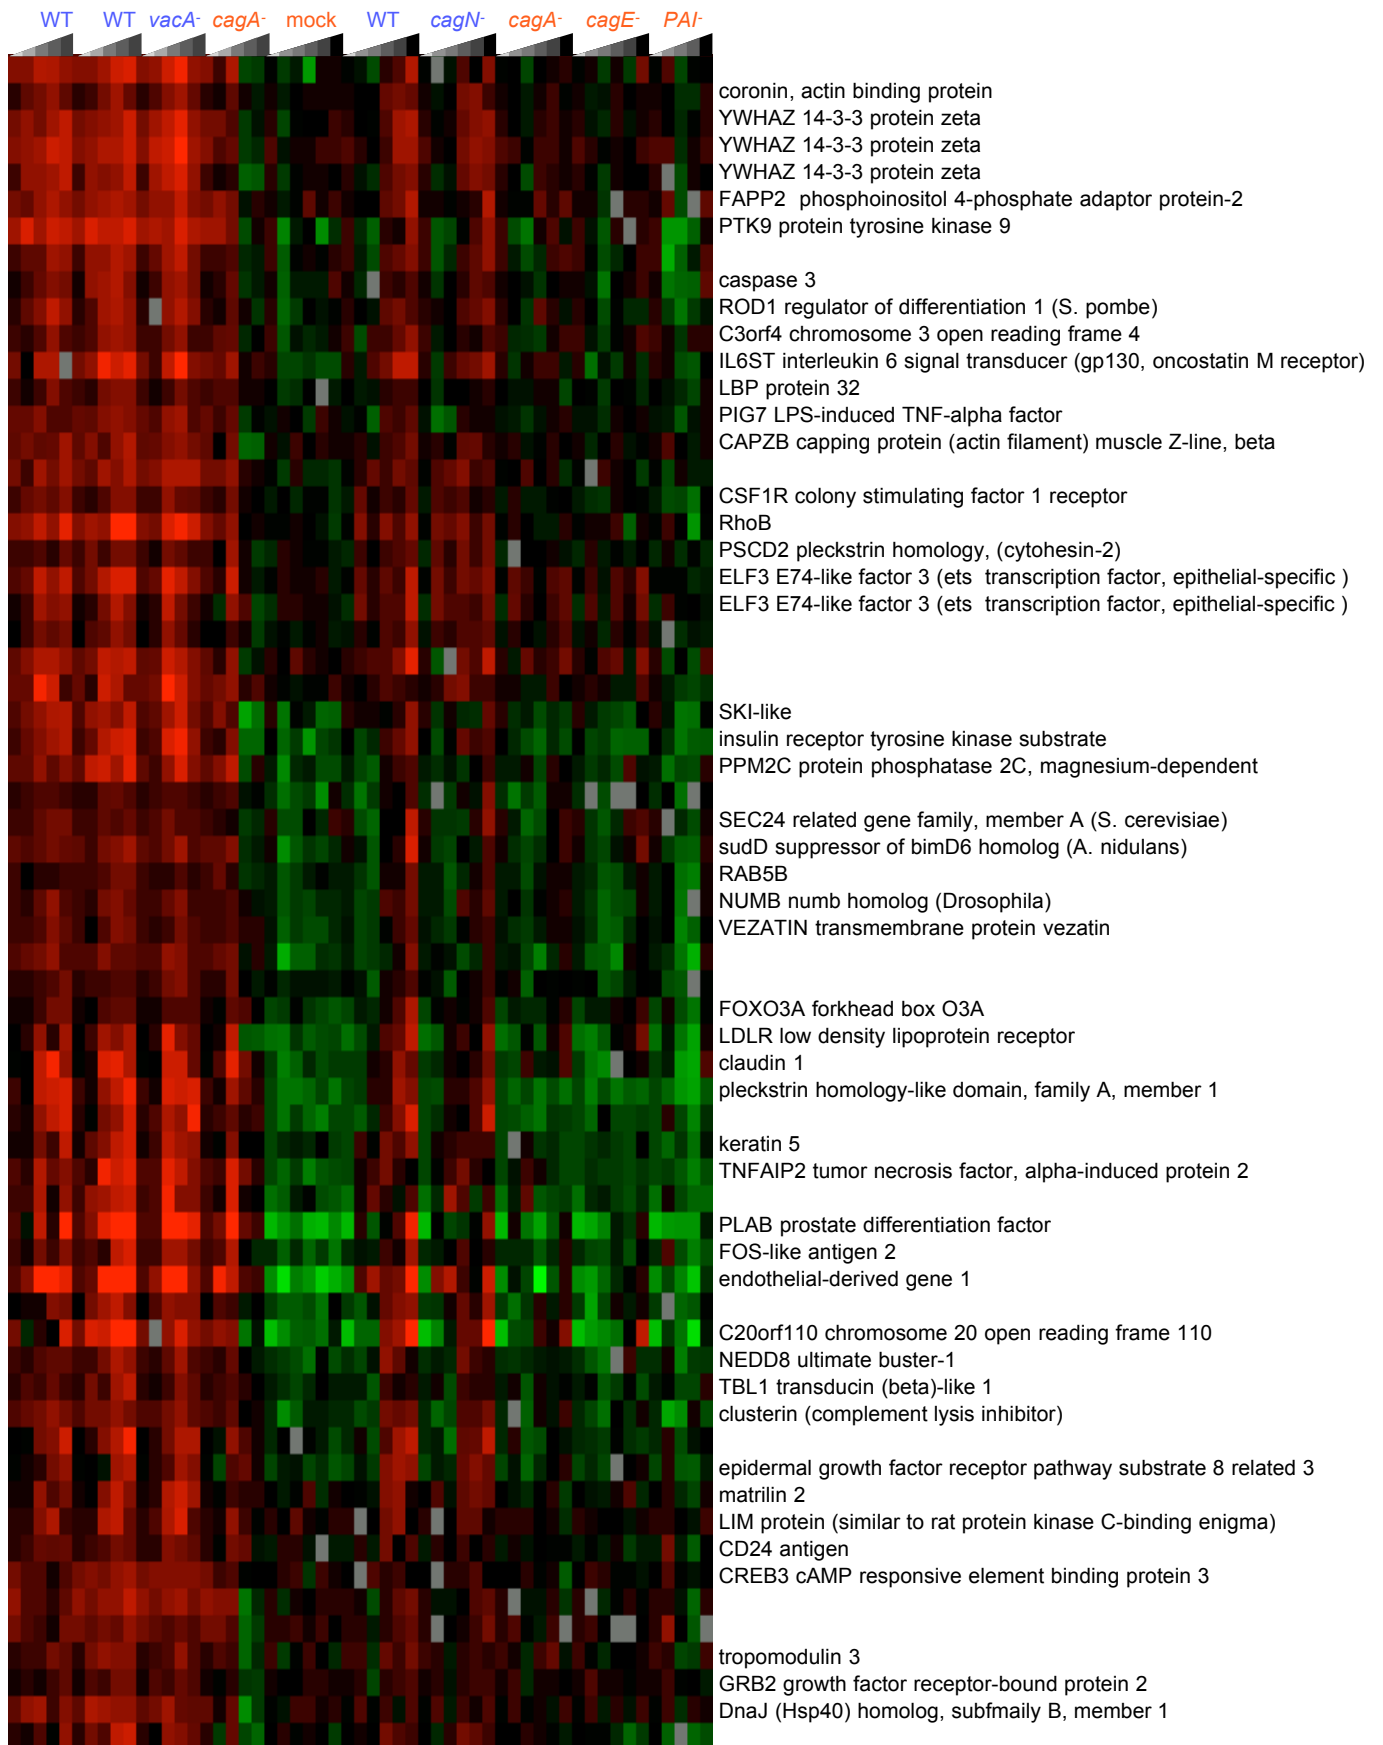

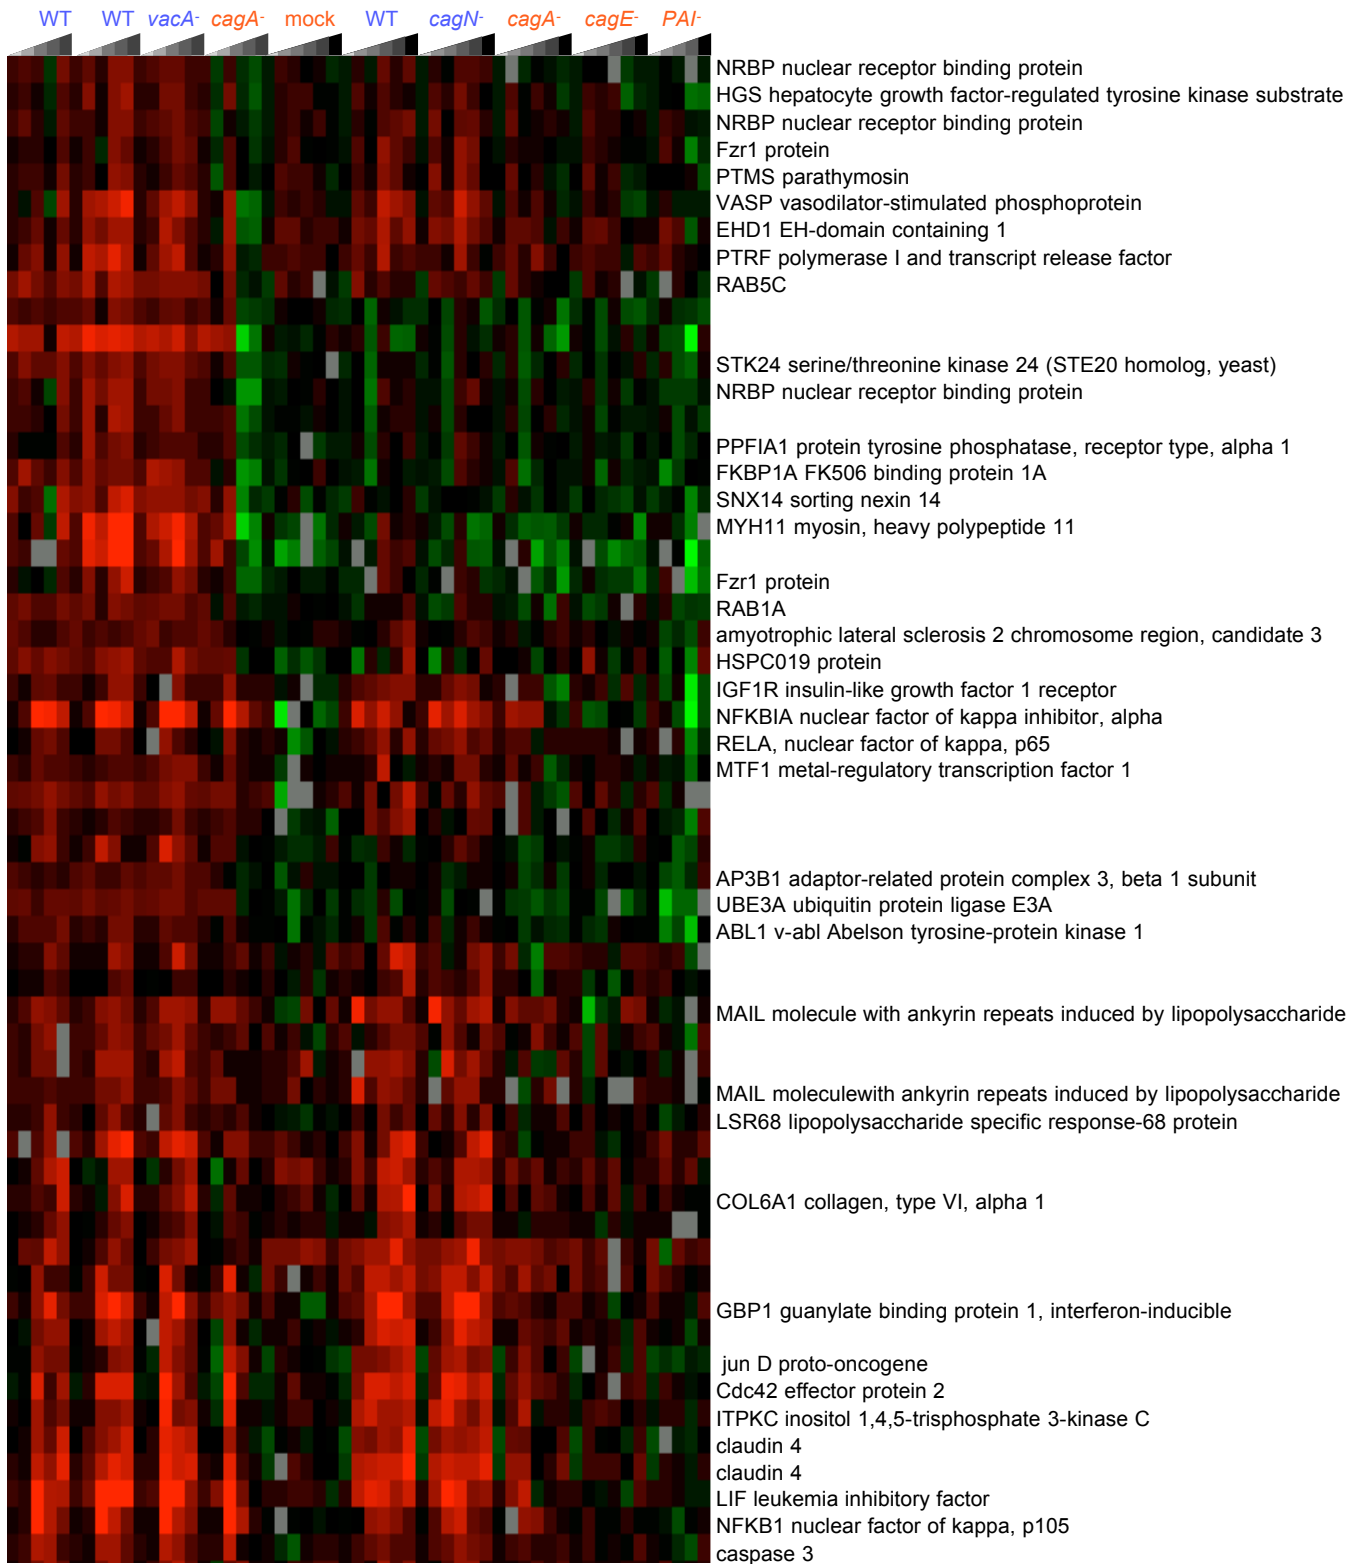

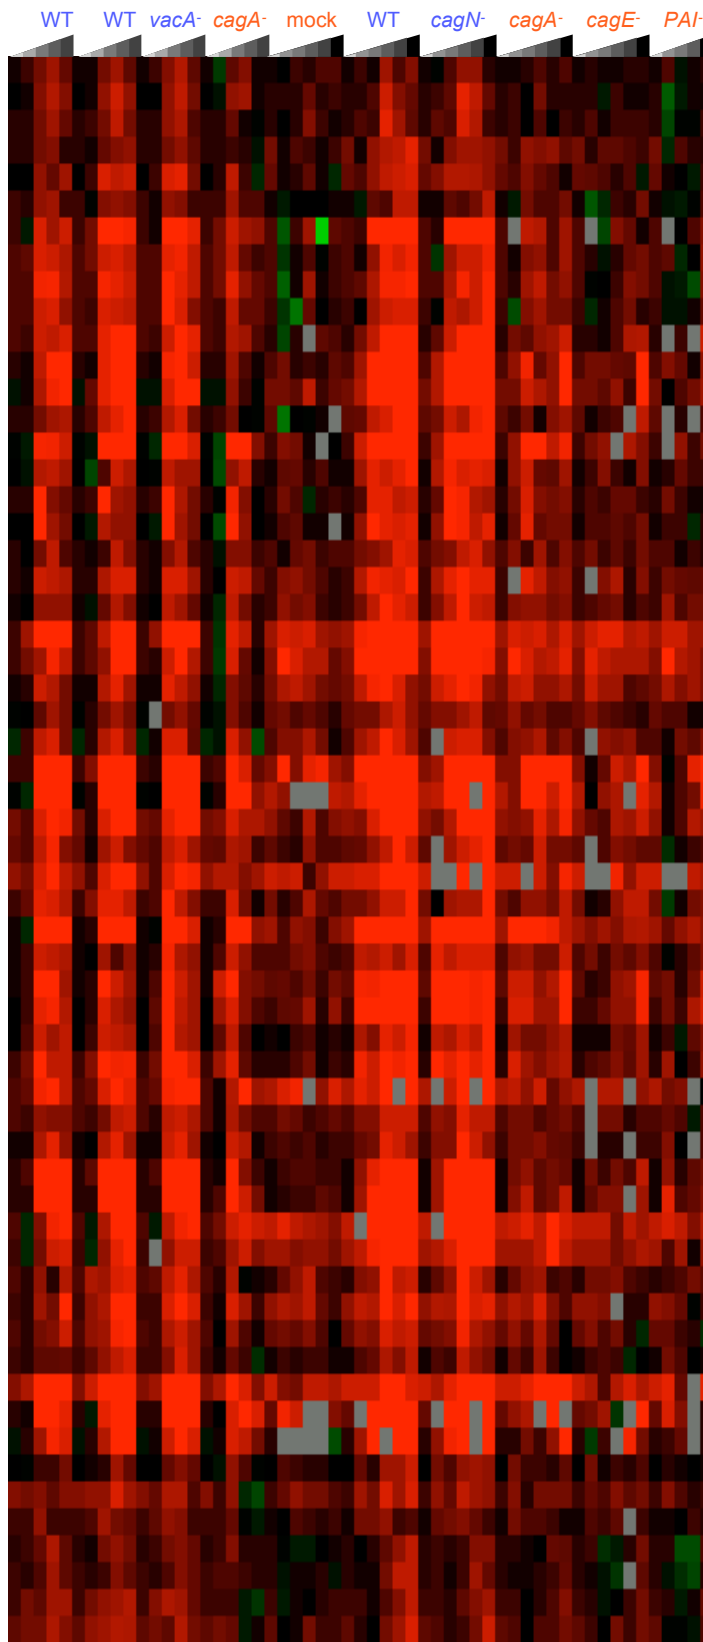

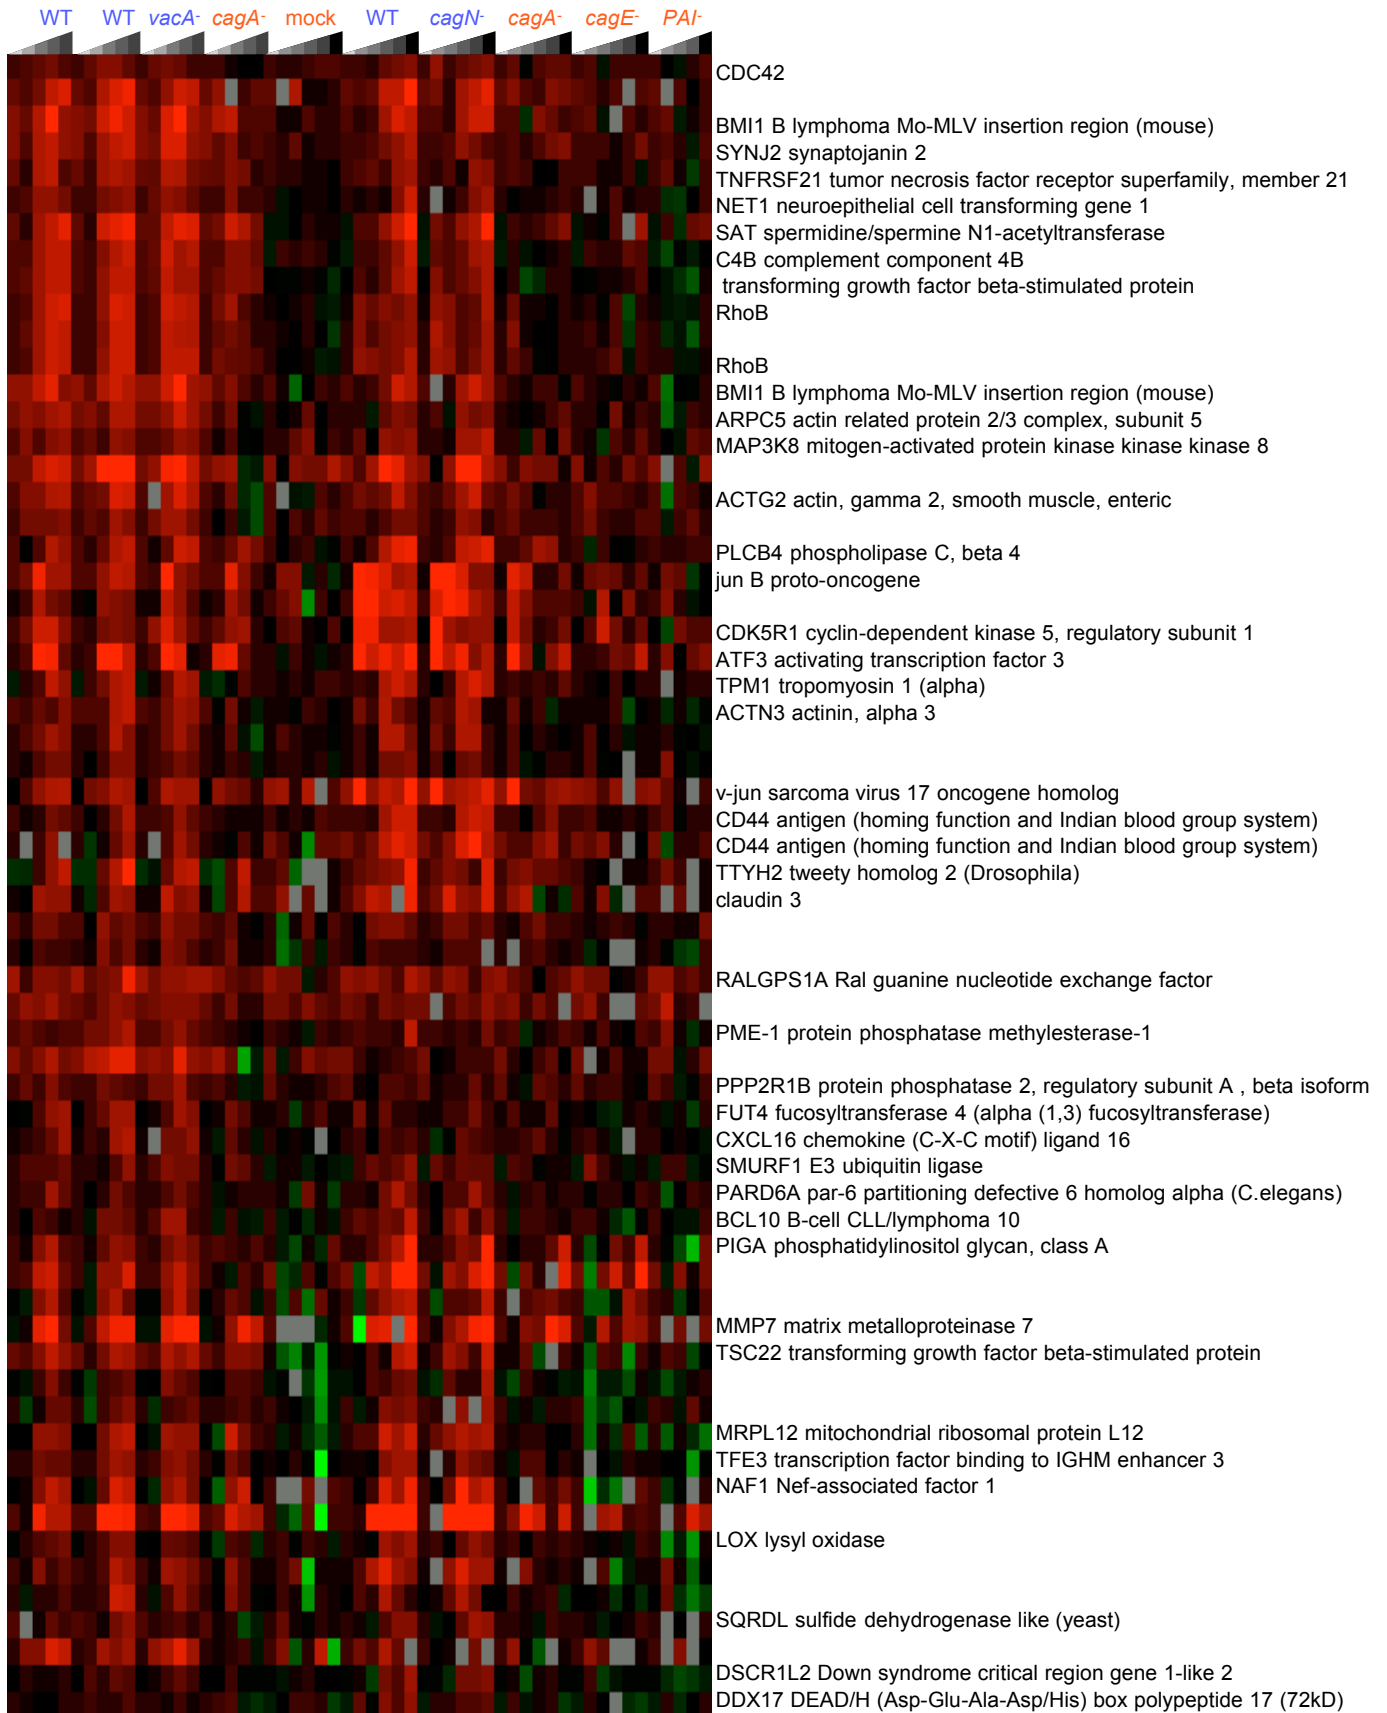

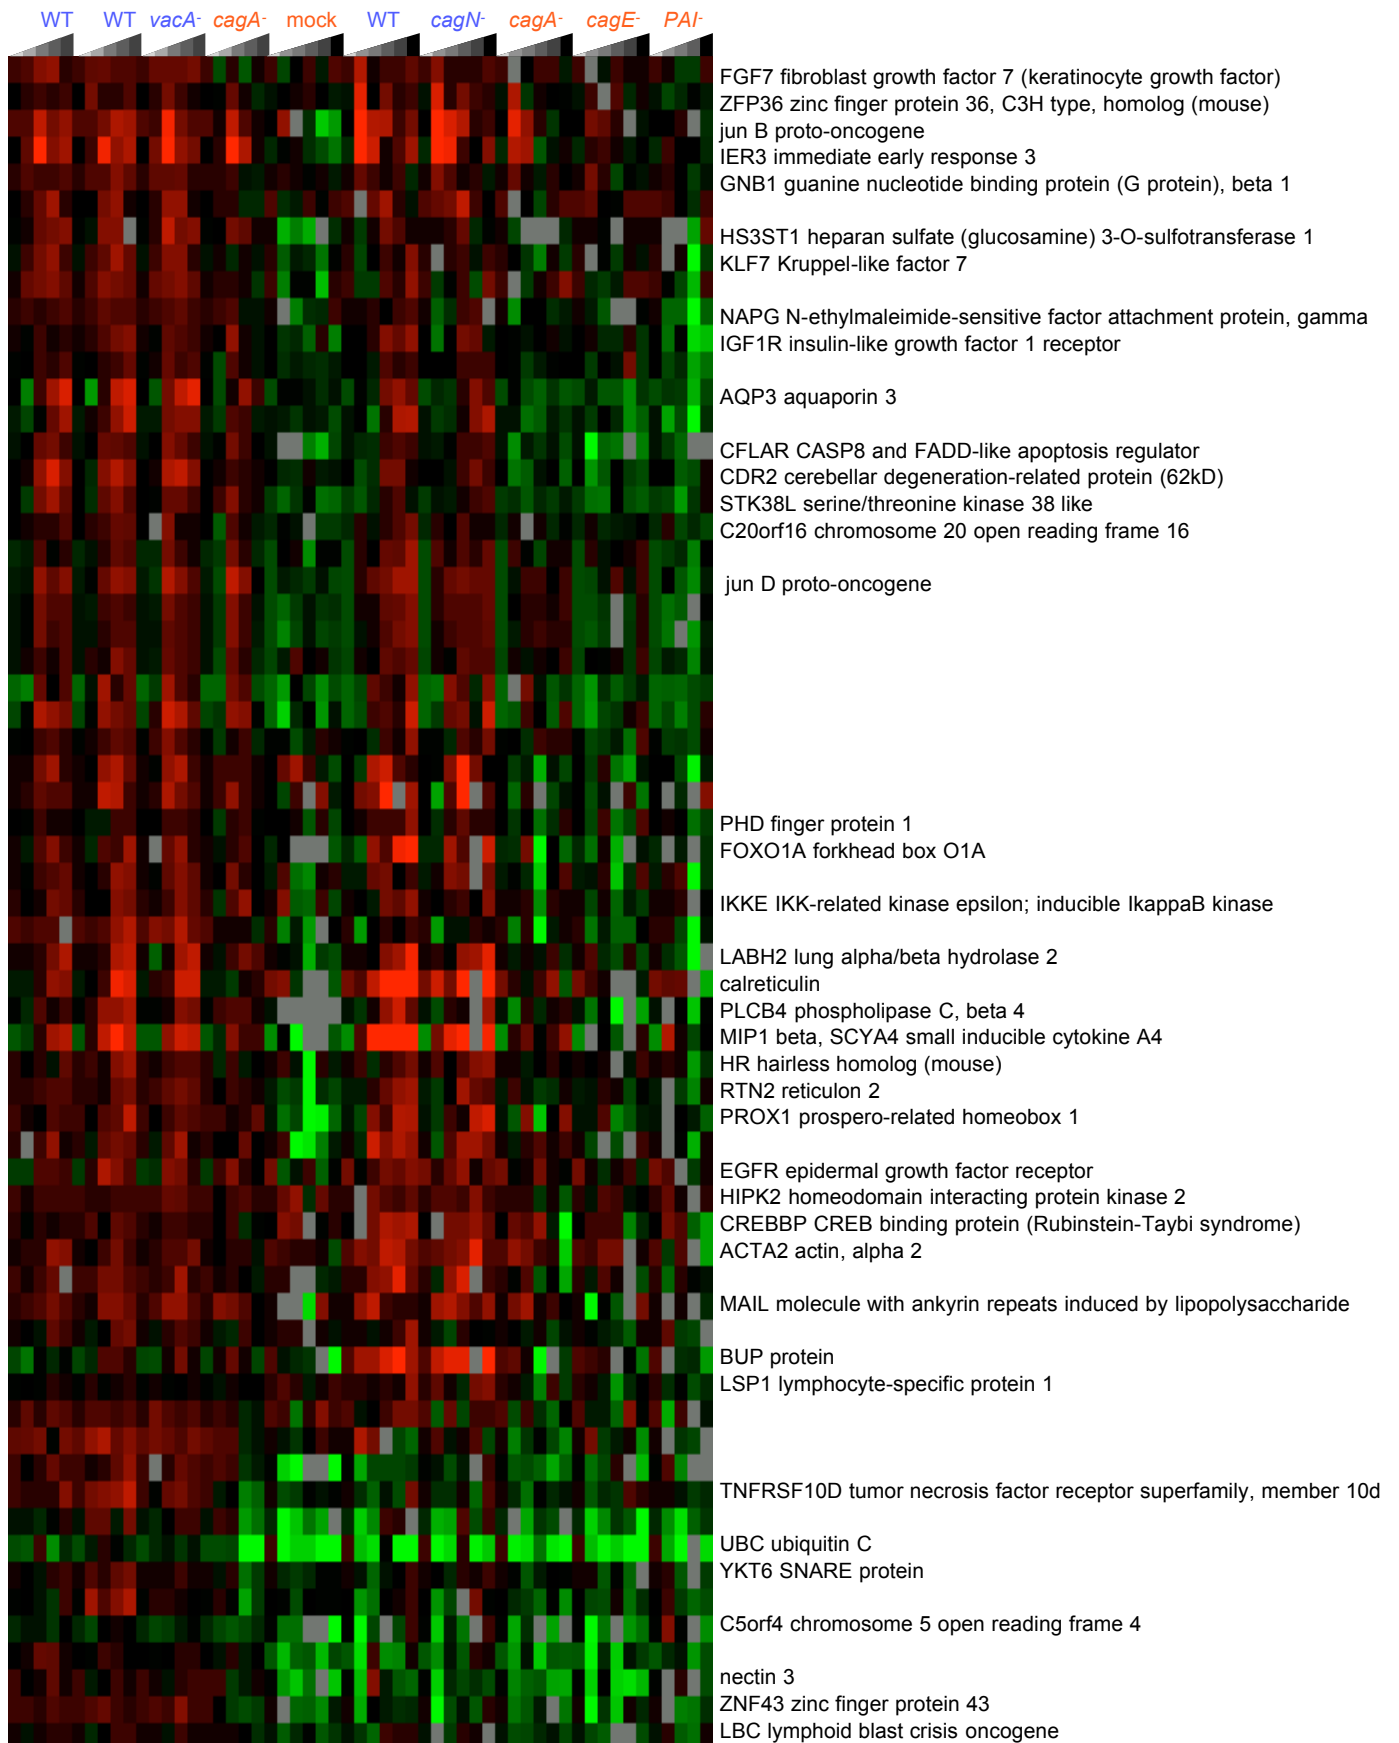

WT WT *vacA*<sup>-</sup> *cagA*<sup>-</sup> mock WT *cagN*<sup>-</sup> *cagA*<sup>-</sup> *cagE*<sup>-</sup> *PAI*<sup>-</sup>

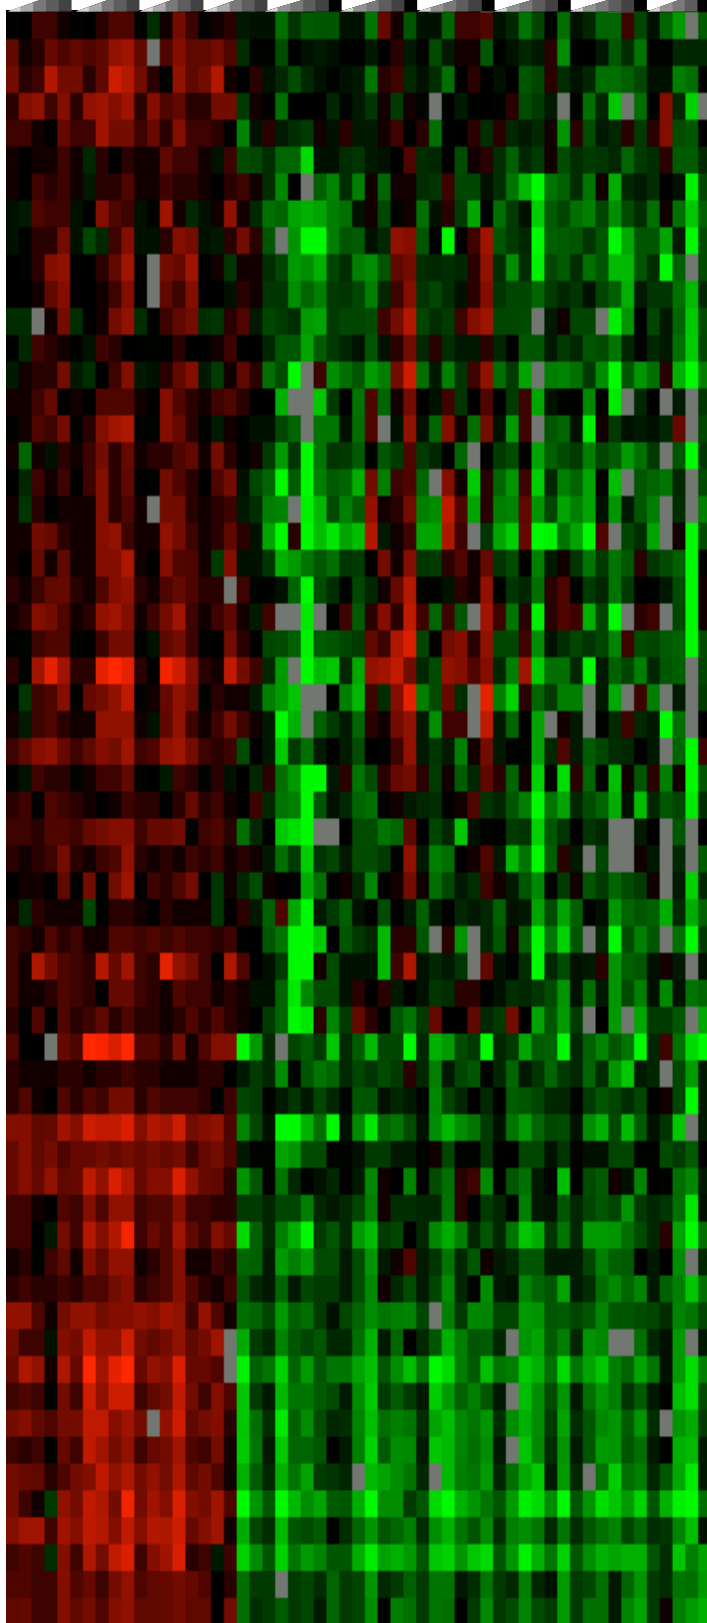

Rho guanine nucleotide exchange factor (GEF) 12  
 JAM1 junctional adhesion molecule 1  
 DOC1 downregulated in ovarian cancer 1  
 NAPA N-ethylmaleimide-sensitive factor attachment protein, alpha  
 yeast Sec31p homolog  
 CTNNB1 catenin (cadherin-associated protein), beta 1  
 DTR diphtheria toxin receptor (heparin-binding EGF-like growth factor)  
 LCK lymphocyte-specific protein tyrosine kinase  
 DEF6 differentially expressed in FDCP 6 homolog (mouse)  
 GSK3B glycogen synthase kinase 3 beta  
 LCK lymphocyte-specific protein tyrosine kinase  
 CDH1 cadherin 1, type 1, E-cadherin (epithelial)  
 KLF13 Kruppel-like factor 13  
 KIF3C kinesin family member 3C  
 FOXO1A forkhead box O1A  
 cAMP response element-binding protein CRE-BPa  
 CYLD cylindromatosis (turban tumor syndrome)  
 PRO0149 protein  
 DRCTNNB1A down-regulated by Ctnnb1, a  
 THEA thioesterase, adipose associated  
 HNF3G hepatocyte nuclear factor 3, gamma  
 HNMT histamine N-methyltransferase  
 AKAP13 A kinase (PRKA) anchor protein 13  
 SHP-2 protein tyrosine phosphatase, PTPN11  
 GLUD1 glutamate dehydrogenase 1  
 BCRP2 Breakpoint cluster region protein, uterine leiomyoma, 2  
 PDZ-GEF1 PDZ domain guanine nucleotide exchange factor(GEF)1  
 STAT5B signal transducer and activator of transcription 5B  
 PDCD8 programmed cell death 8 (apoptosis-inducing factor)  
 VPS39 Vam6/Vps39-like  
 FAT tumor suppressor homolog 1 (Drosophila)  
 PACSIN2 protein kinase C and casein kinase substrate in neurons 2  
 ARF3 ADP-ribosylation factor 3  
 UCHL1 ubiquitin carboxyl-terminal esterase L1

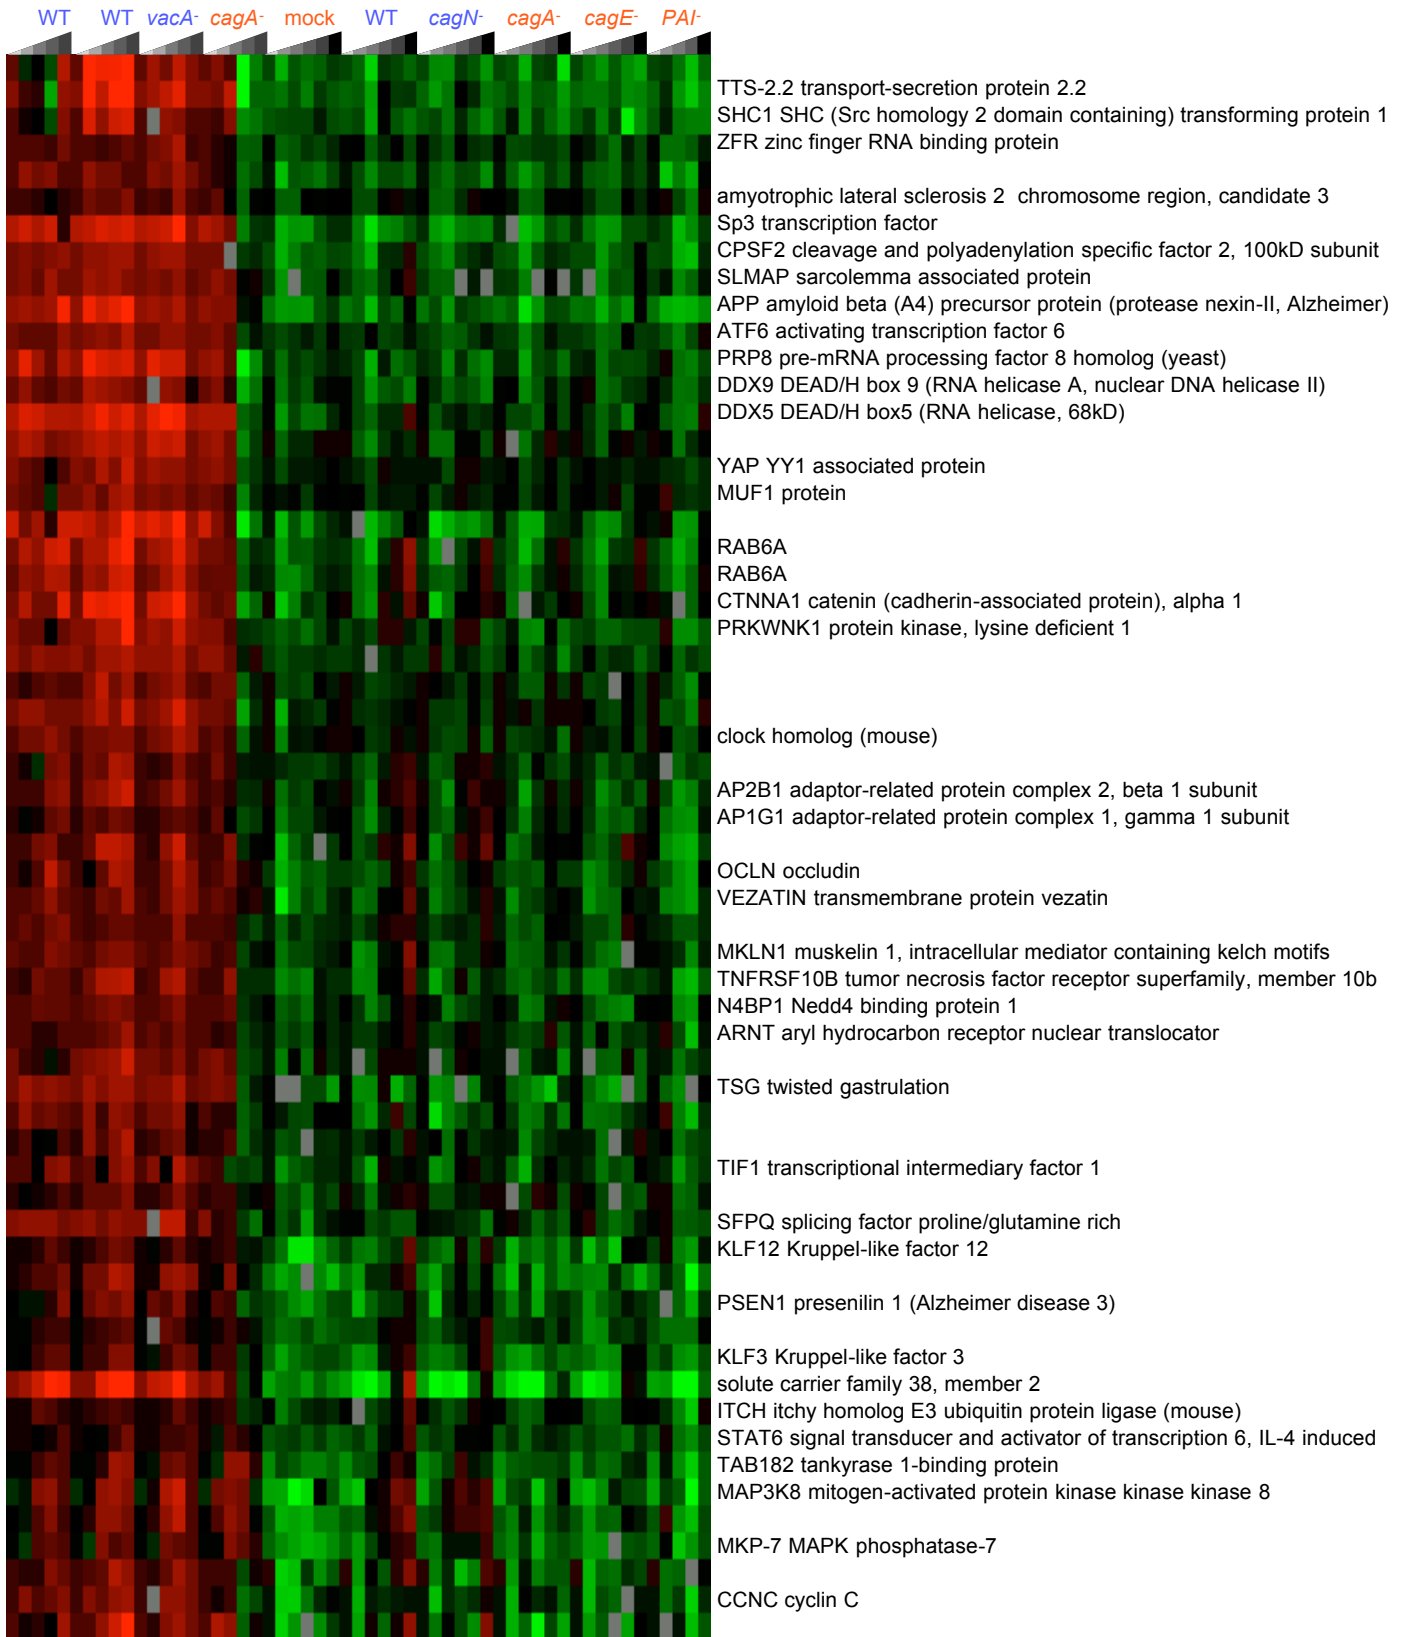



WT WT *vacA*<sup>-</sup> *cagA*<sup>-</sup> mock WT *cagN*<sup>-</sup> *cagA*<sup>-</sup> *cagE*<sup>-</sup> *PAI*<sup>-</sup>

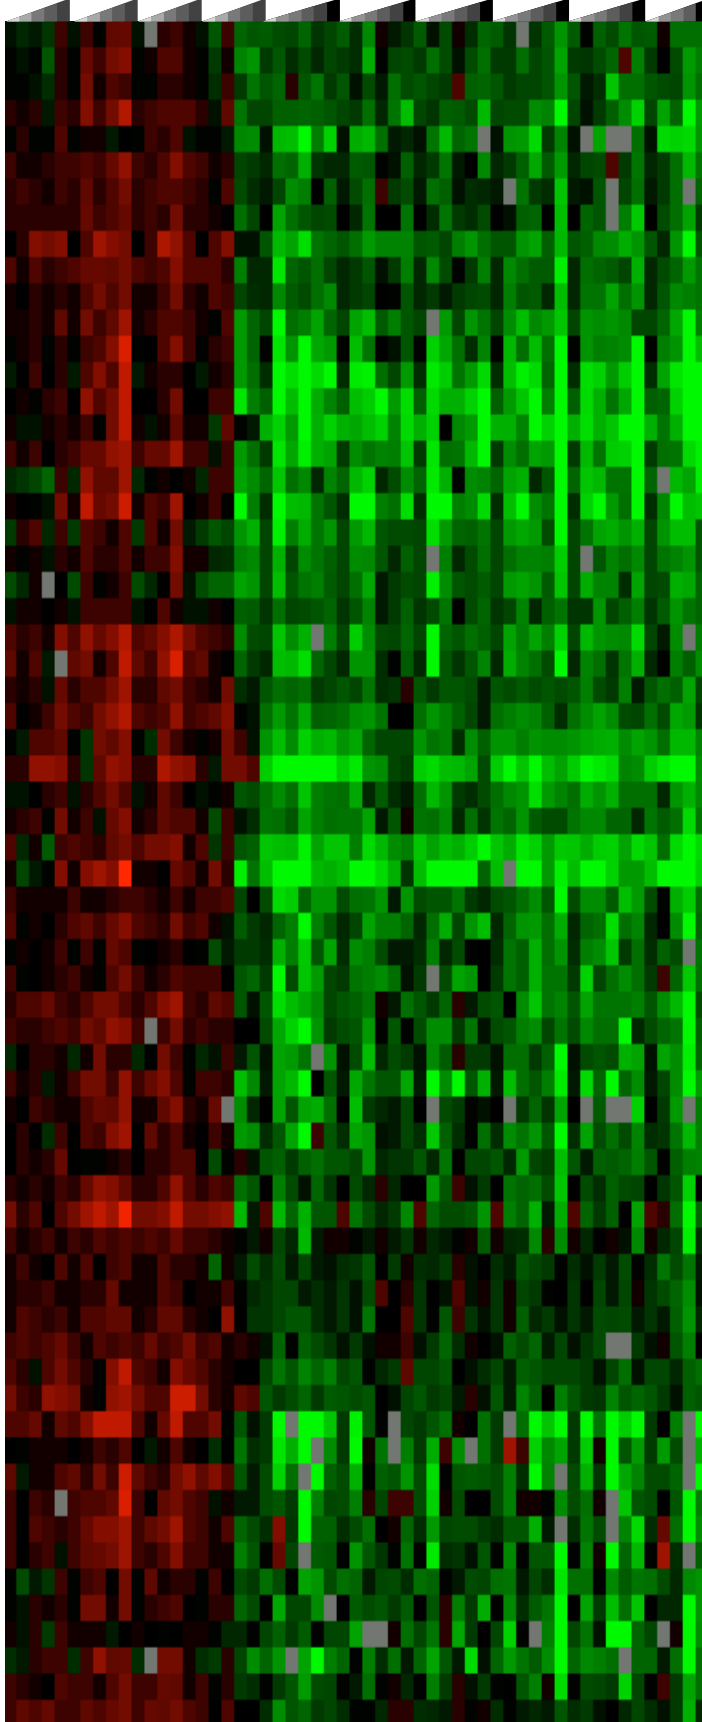

RAB35  
 RES4-22 gene  
 ADRBK1 adrenergic, beta, receptor kinase 1  
 KIF5B kinesin family member 5B  
 STAT5B signal transducer and activator of transcription 5B  
 SATB1 special AT-rich sequence binding protein 1  
 solute carrier family 23 (nucleobase transporters), member 1  
 TRAP240 thyroid hormone receptor-associated protein, 240 kDa subunit  
 AF-6 (Drosophila, trithorax homolog)  
 AF-6 (Drosophila, trithorax homolog)  
 LZ16 nasopharyngeal carcinoma susceptibility protein  
 HIPK3 homeodomain interacting protein kinase 3  
 COPA coatamer protein complex, subunit alpha  
 MAP3K7IP2 mitogen-activated protein kinase kinase kinase 7 interactor 2  
 SLMAP sarcolemma associated protein  
 MAP3K7IP2 mitogen-activated protein kinase kinase kinase 7 interactor 2  
 PPP4R1 protein phosphatase 4, regulatory subunit 1  
 PPP4R1 protein phosphatase 4, regulatory subunit 1  
 PSAP prosaposin  
 OGT O-linked N-acetylglucosamine (GlcNAc) transferase  
 ARHGEF2 rho/rac guanine nucleotide exchange factor (GEF) 2  
 CYLN2 cytoplasmic linker 2  
 H1F0 H1 histone family, member 0  
 SCD stearoyl-CoA desaturase (delta-9-desaturase)  
 ATBF1 AT-binding transcription factor 1  
 IRF2 interferon regulatory factor 2  
 NEDD4L neural precursor cell expressed, developmentally down 4-like  
 DLAT dihydrolipoamide S-acetyltransferase  
 P66 transcription repressor component of the MeCP1 complex  
 GNAS complex locus  
 STX5A syntaxin 5A  
 SEC14-like 1  
 PDE8A phosphodiesterase 8A  
 BHC80 BRAF35/HDAC2 complex (80 kDa)  
 CNP 2',3'-cyclic nucleotide 3' phosphodiesterase  
 TRAP240 thyroid hormone receptor-associated protein, 240 kDa subunit

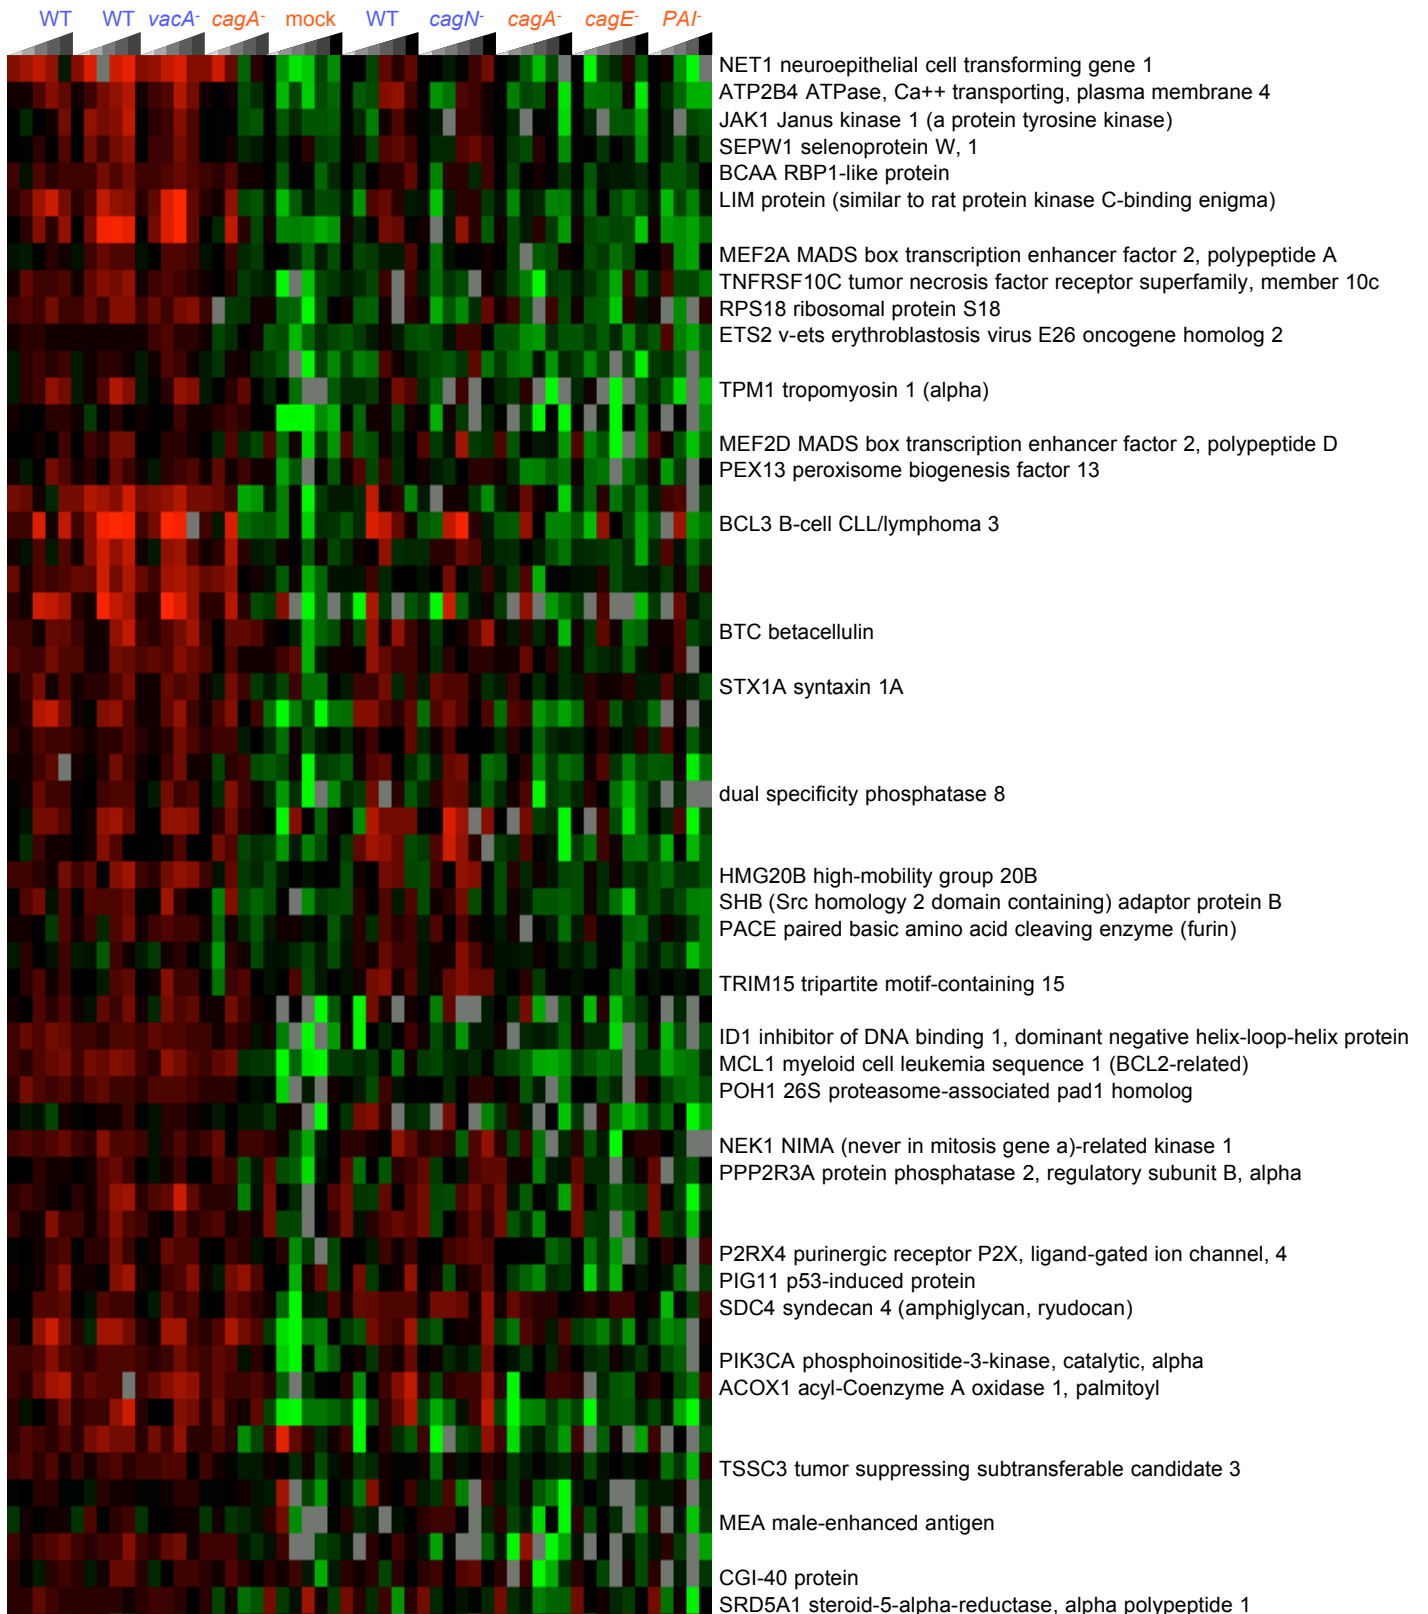

1/4 0 4 fold induced

0 .5 1 3 6 12 24 hours
