# Supplementary material
Source: PubMed Central journal article supplement (PMC137556)

mock WT *cagN*<sup>-</sup> *cagA*<sup>-</sup> *cagE*<sup>-</sup> *PAI*<sup>-</sup>

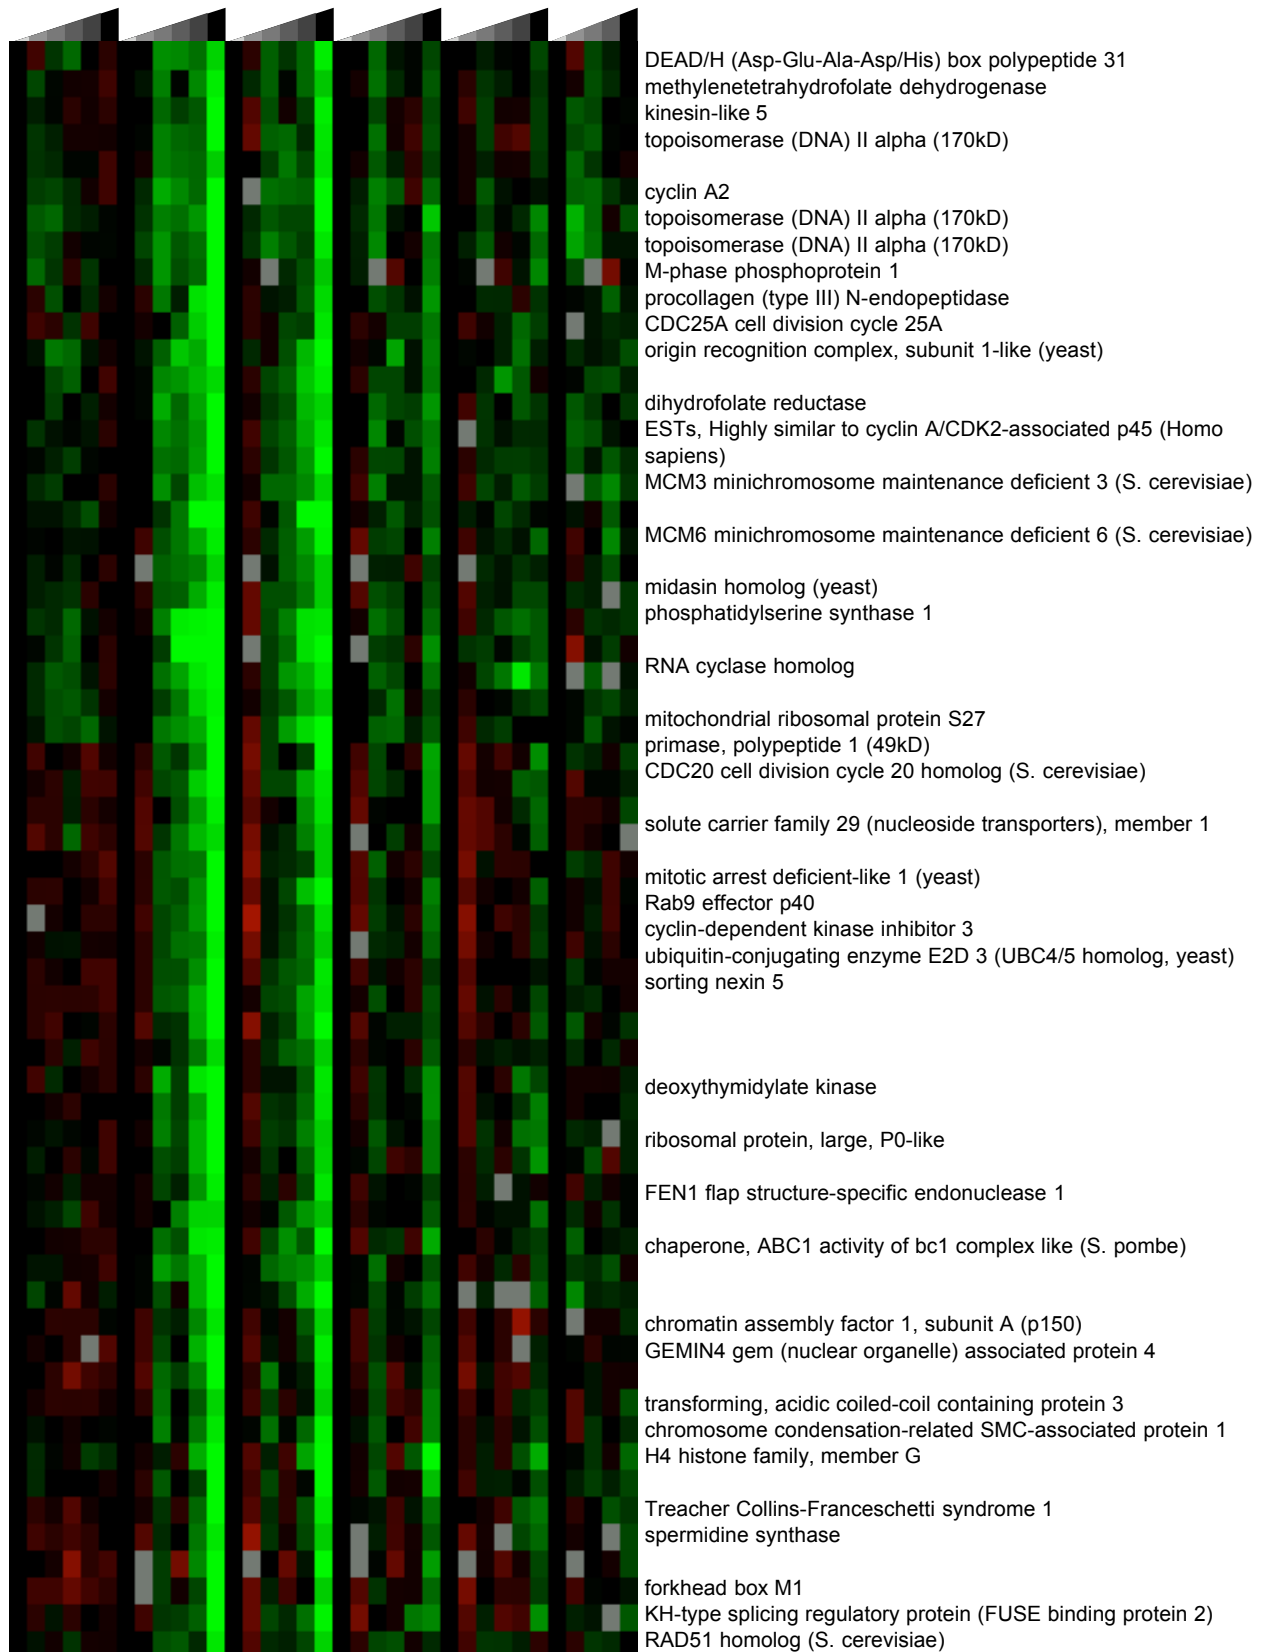

1/4 0 4  
 fold induced

0 1 3 6 12 24  
 hours

Supplement: pnas_182558799_13.pdf [file pnas_182558799_13.pdf]

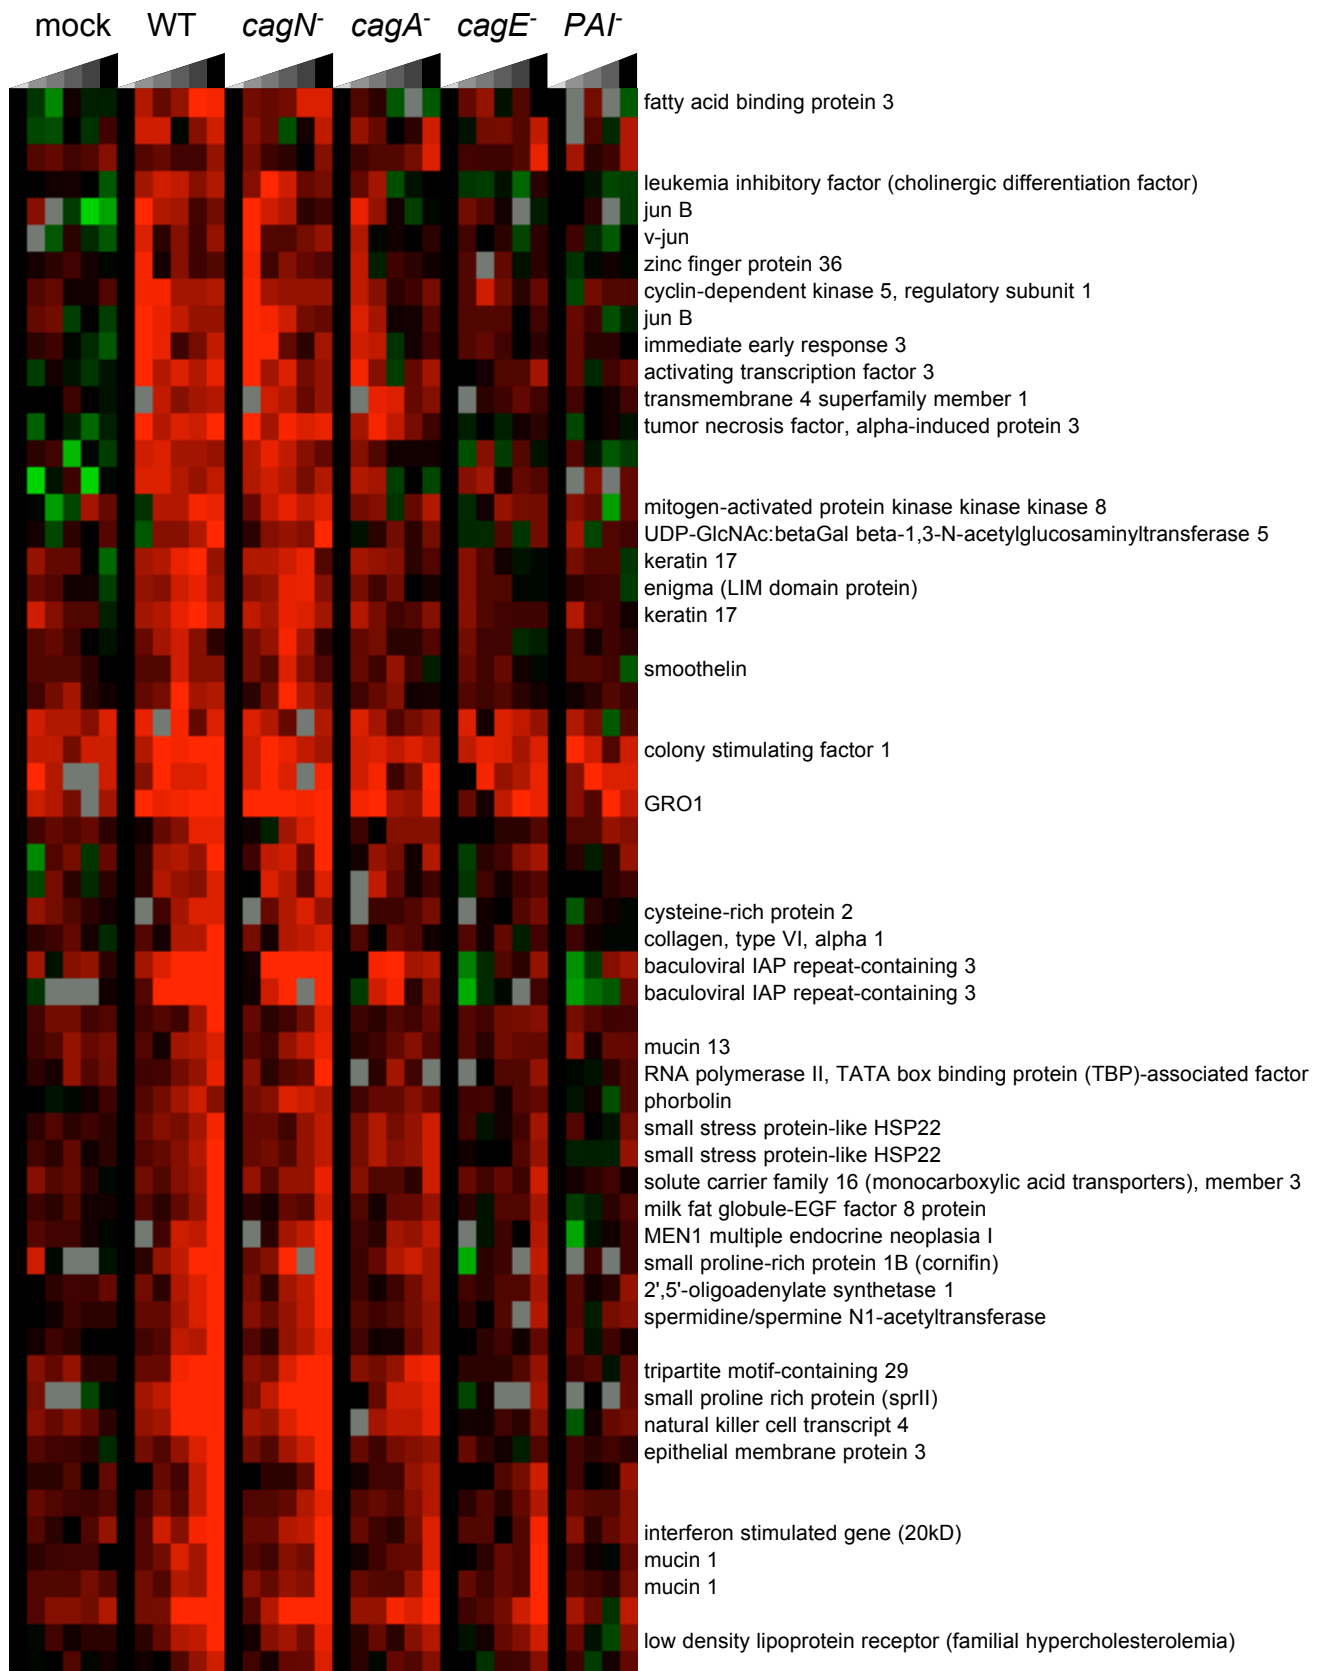

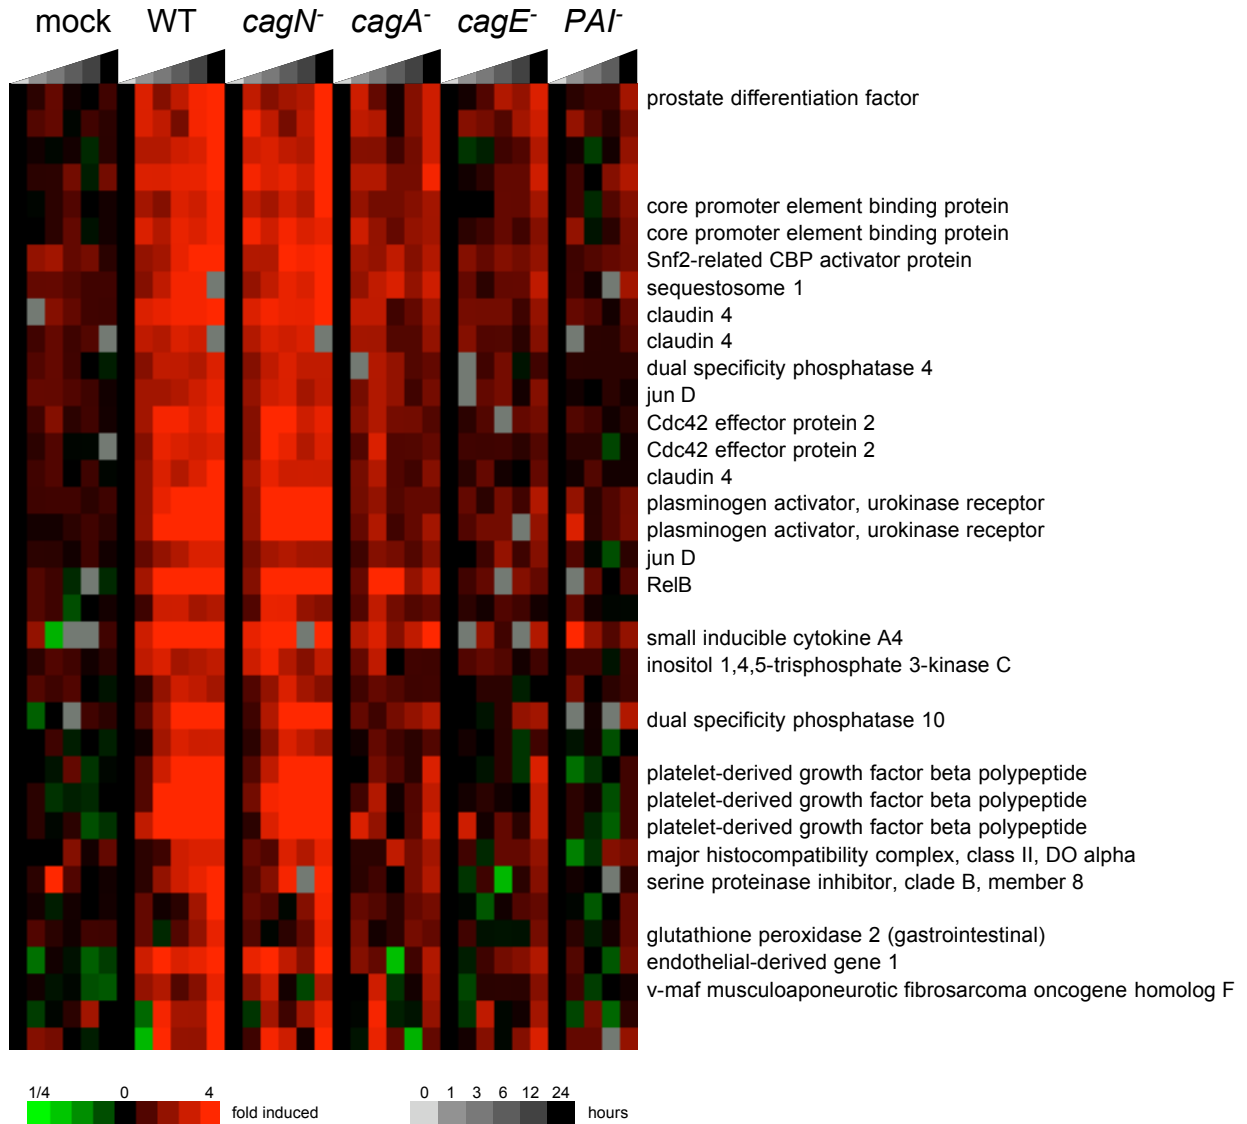

Supplement: pnas_182558799_15.pdf [file pnas_182558799_15.pdf]

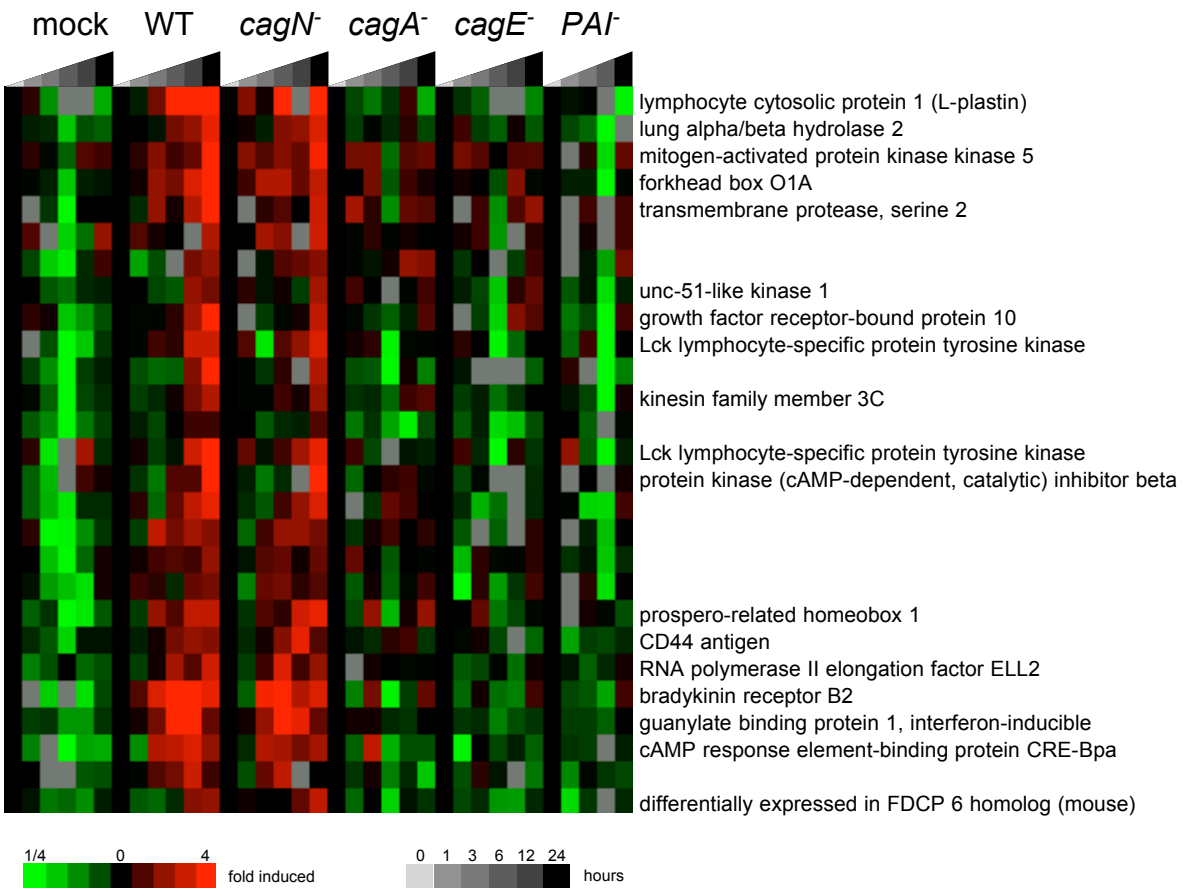

Supplement: pnas_182558799_19.pdf [file pnas_182558799_19.pdf]

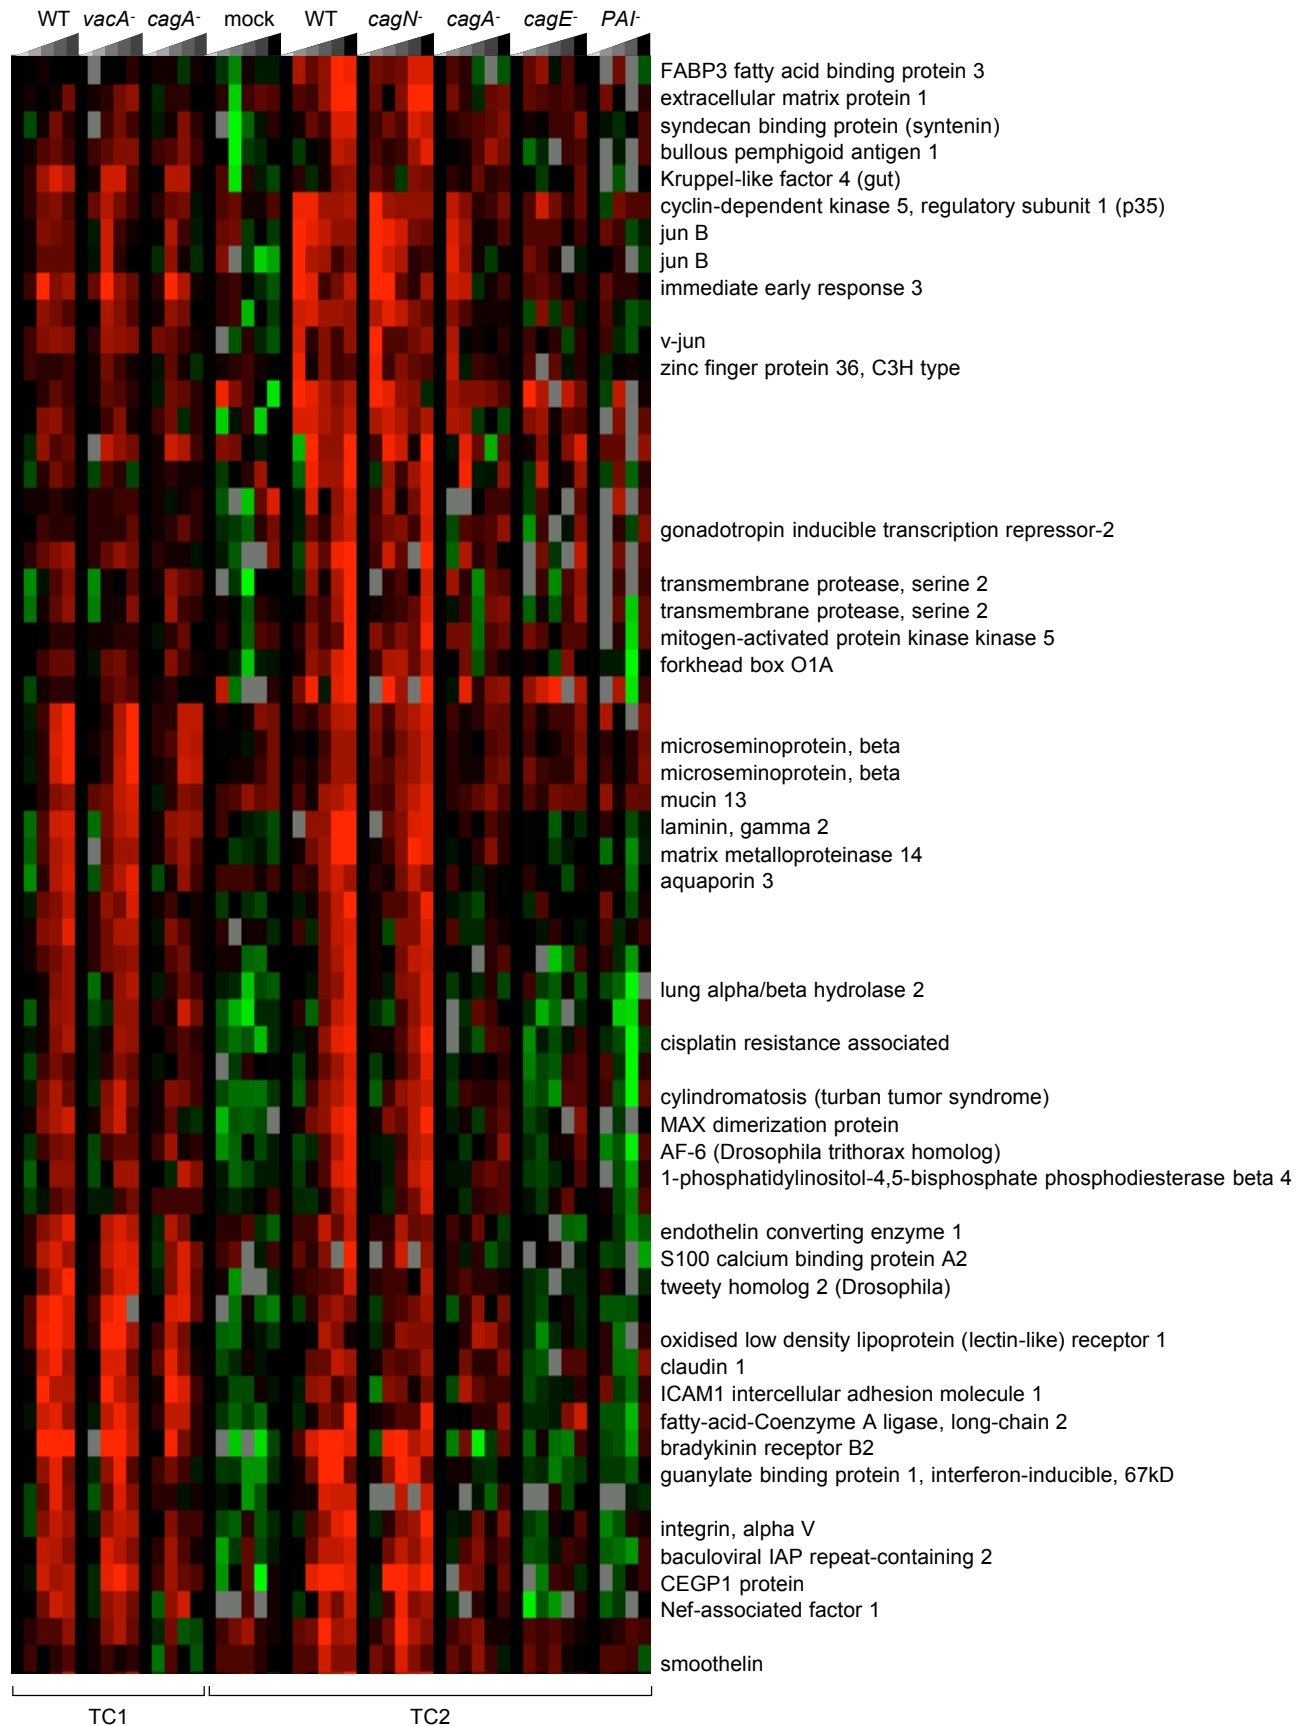

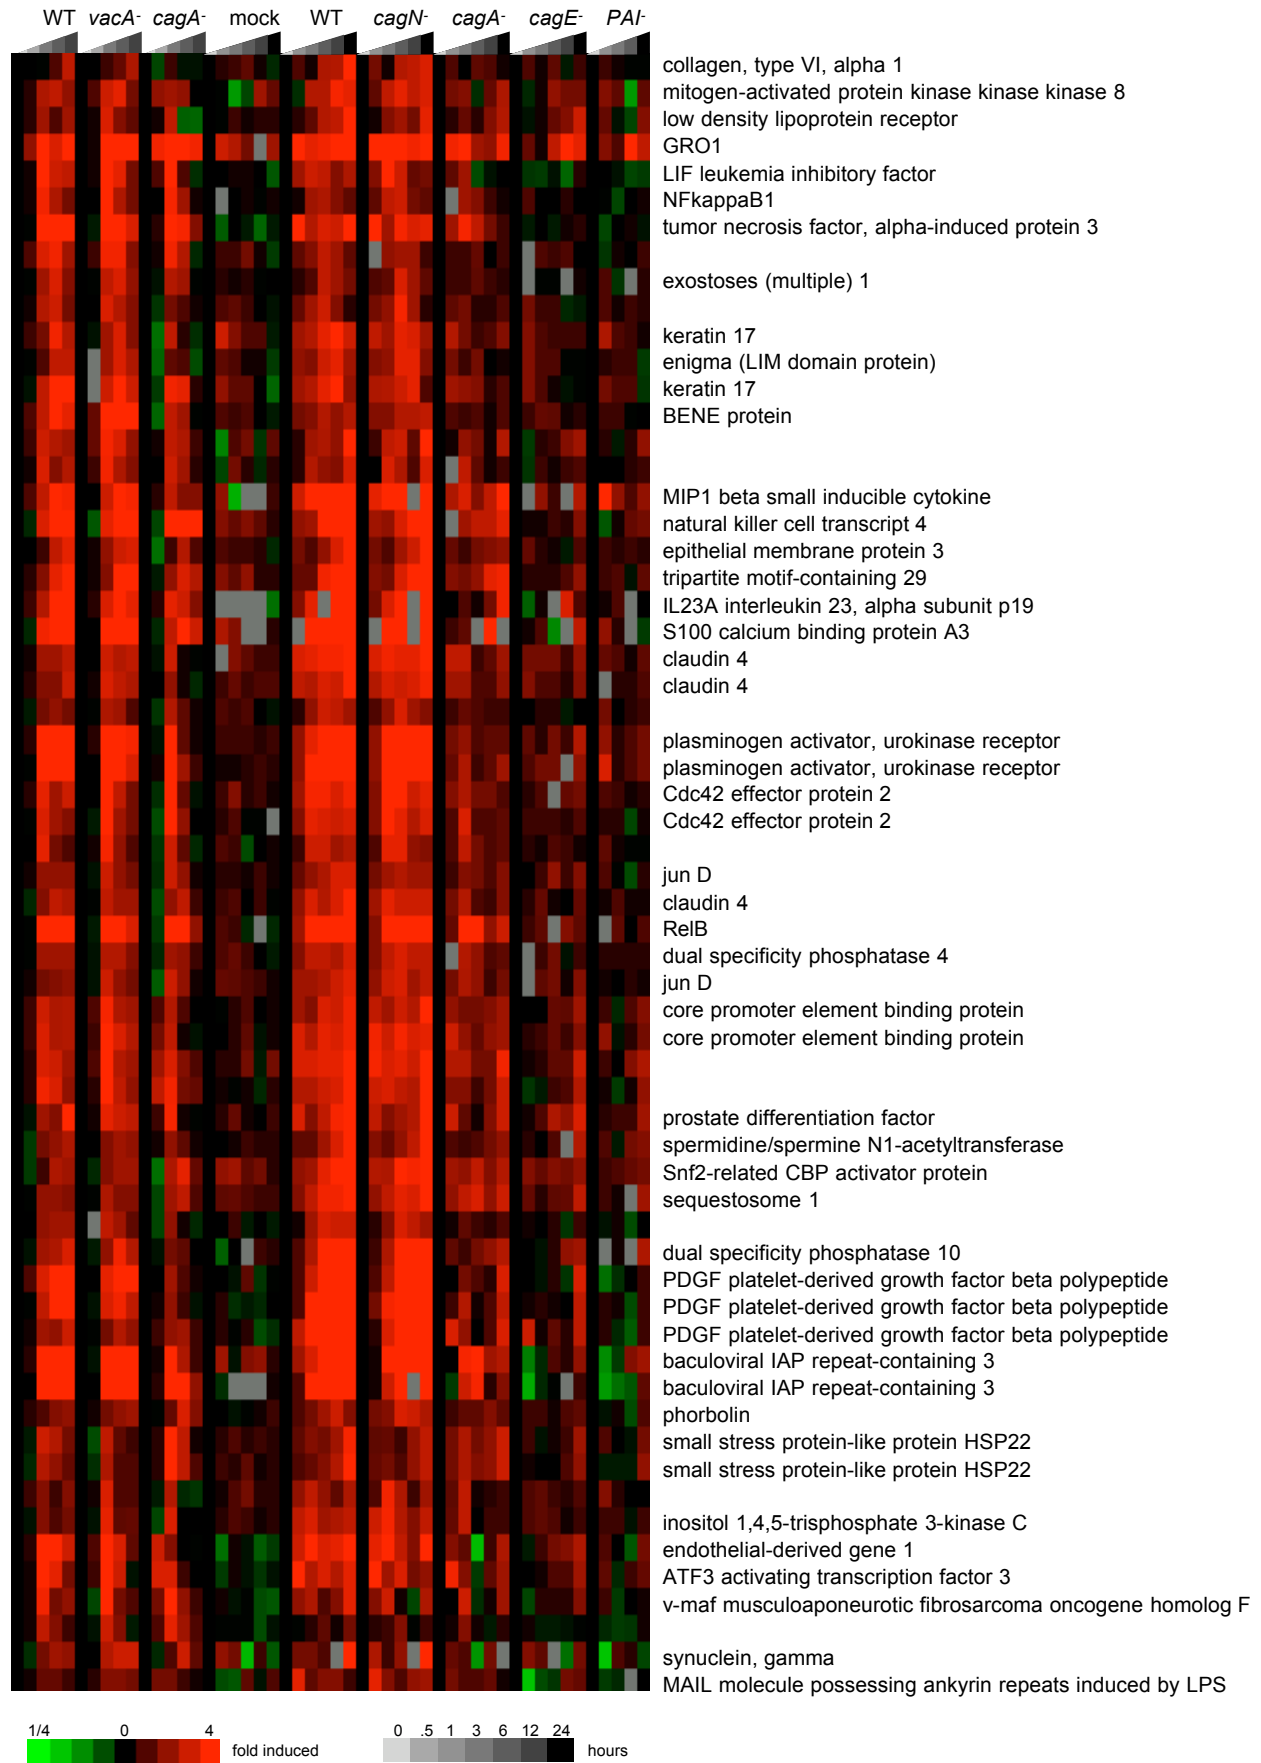

Supplement: pnas_182558799_2.pdf [file pnas_182558799_2.pdf]

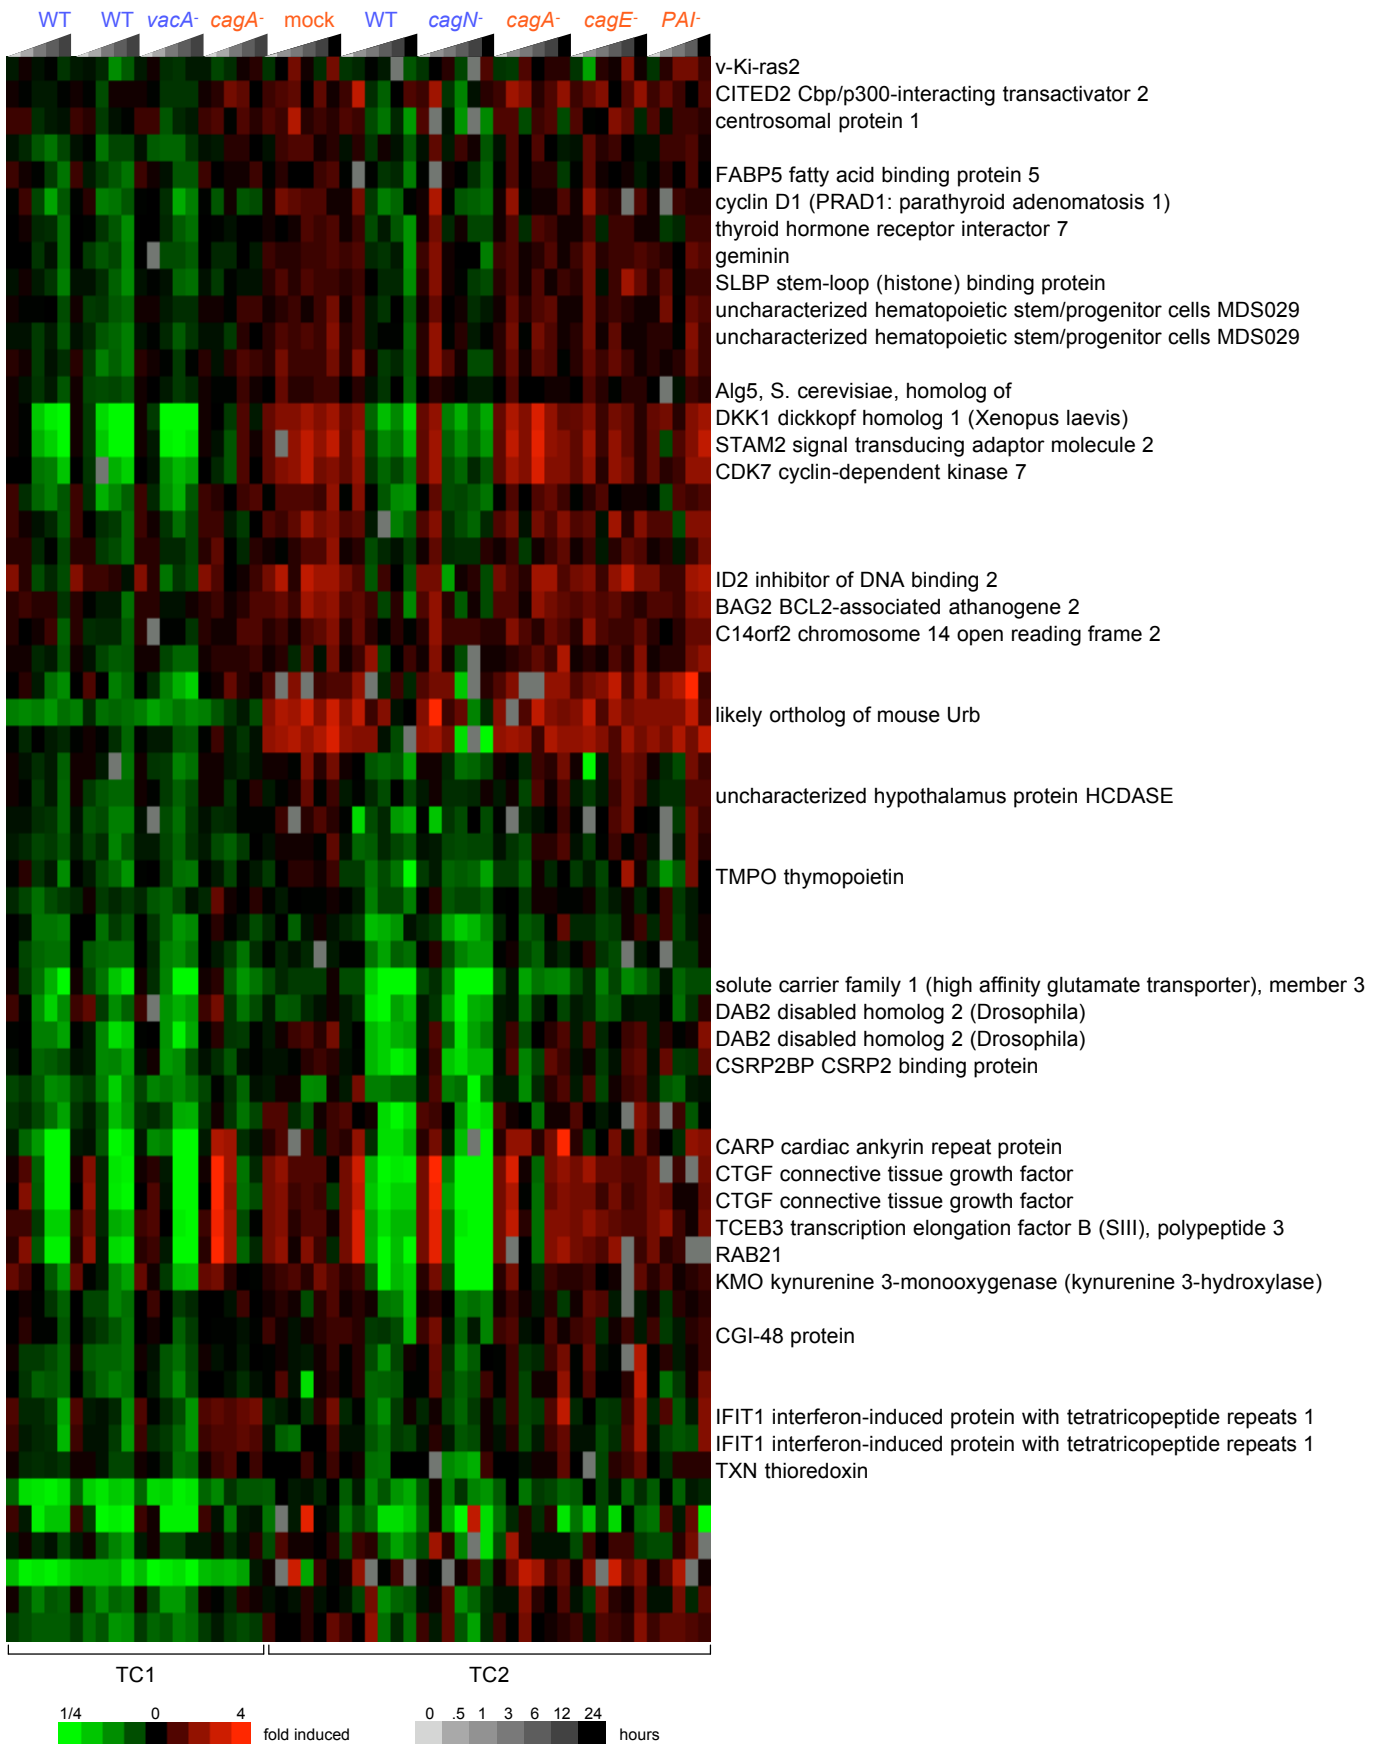

Supplement: pnas_182558799_23.pdf [file pnas_182558799_23.pdf]

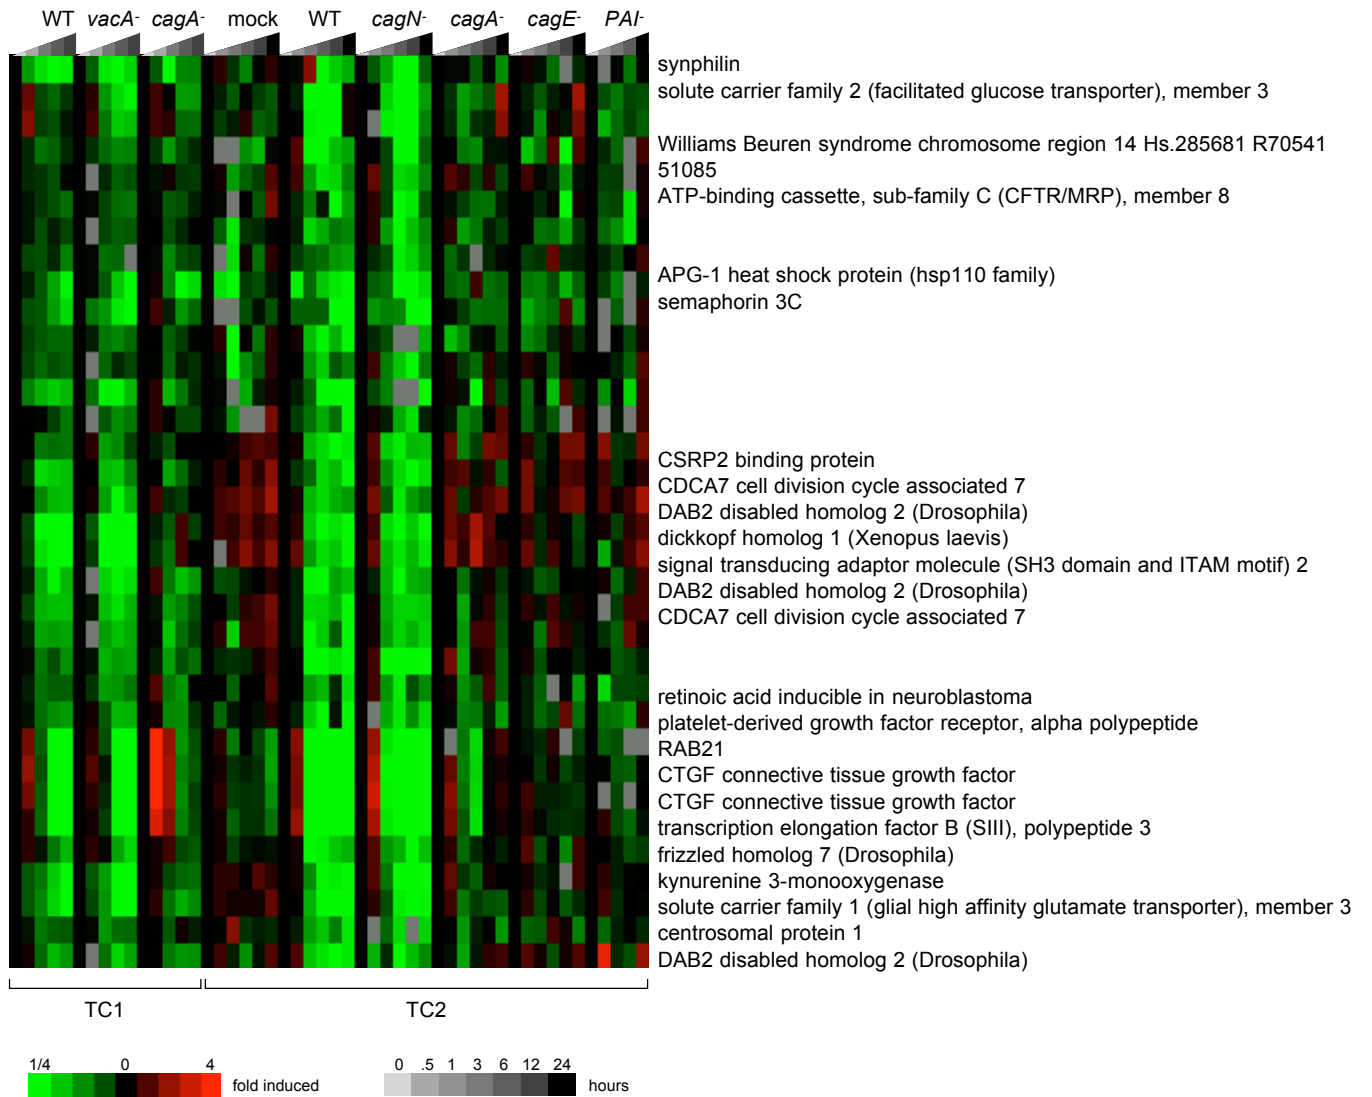

Supplement: pnas_182558799_4.pdf [file pnas_182558799_4.pdf]

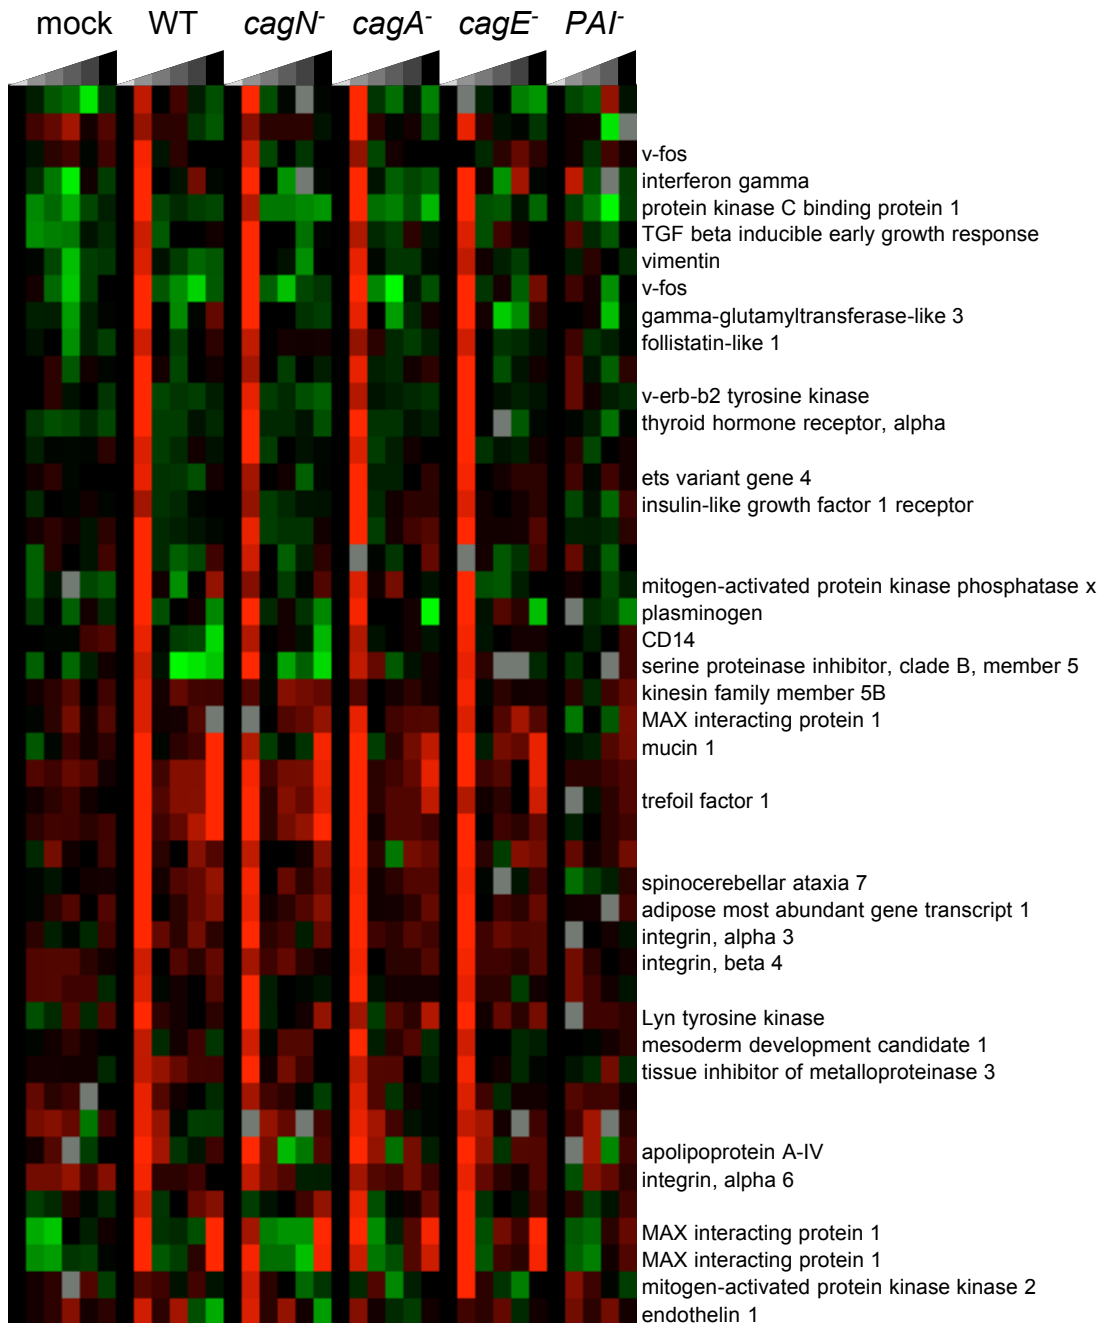

1/4 0 4  
fold induced

0 1 3 6 12 24  
hours

Supplement: pnas_182558799_7.pdf [file pnas_182558799_7.pdf]

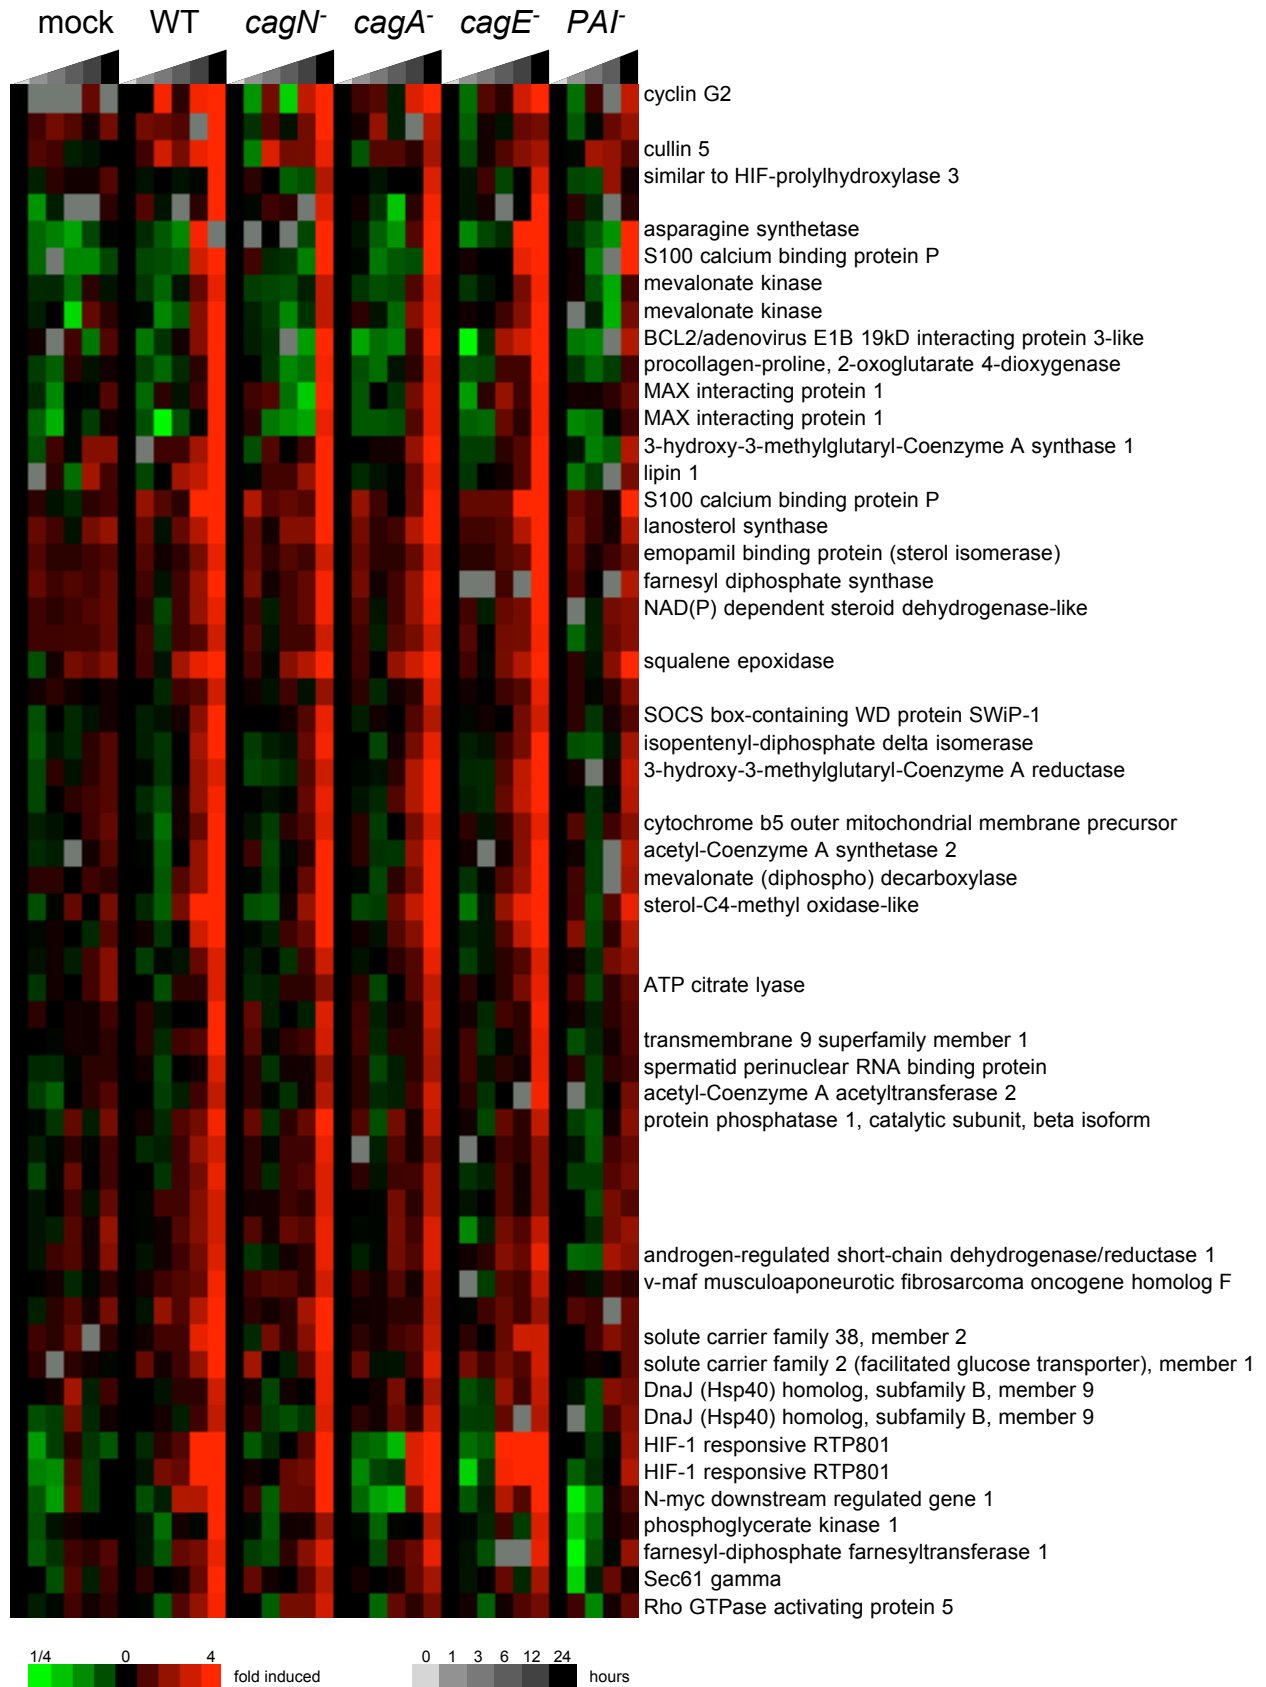

Supplement: pnas_182558799_9.pdf [file pnas_182558799_9.pdf]
